# Supplementary material for: Interspecies Brain PBPK Modeling Platform to Predict Passive Transport through the Blood–Brain Barrier and Assess Target Site Disposition
Source: MDPI journal article supplement (doi:10.3390/pharmaceutics16020226), 2024-02-04
Supplement: s1 [file s1]

# Interspecies Brain PBPK Modeling Platform to Predict Passive Transport through the Blood-Brain Barrier and Assess Target-Site Disposition

## Supplementary Materials

**Parsshava Mehta <sup>1</sup>, Amira Soliman <sup>1,2</sup>, Leyanis Rodriguez-Vera <sup>3</sup>, Stephan Schmidt <sup>1</sup>, Paula Muniz <sup>3</sup>, Monica Rodriguez <sup>3</sup>, Marta Forcadell <sup>4</sup>, Emili Gonzalez-Perez <sup>4</sup> and Valvanera Vozmediano <sup>1,3\*</sup>**

<sup>1</sup> Center for Pharmacometrics and Systems Pharmacology, Department of Pharmaceutics, College of Pharmacy, University of Florida, Orlando, FL 32827, USA; parsshava.mehta@ufl.edu (P.M.); amira.soliman@ufl.edu (A.S.); sschmidt@cop.ufl.edu (S.S.)

<sup>2</sup> Department of Pharmacy Practice, Faculty of Pharmacy, Helwan University, Helwan 11795, Egypt

<sup>3</sup> Model Informed Development, CTI Laboratories, Covington, KY 41011, USA; lrodriguez@ctifacts.com (L.R.-V.); pmuniz@ctifacts.com (P.M.); mrodriguez@ctifacts.com (M.R.)

<sup>4</sup> Neuraxpharm Pharmaceuticals SL, Clinical Research and Evidence-Generation Science, 08970 Barcelona, Spain; forcadellmarta@gmail.com (M.F.); emiligonzalezperez@gmail.com (E.G.-P.)

\* Correspondence: valva@ufl.edu or vvozmediano@ctifacts.com

## Contents

### List of Figures

**Figure S1:** Simulated versus observed concentration profiles for plasma and CNS in rats ----- 3

**Figure S2:** Simulated versus observed concentration profiles in rats ----- 5

**Figure S3:** Goodness-of-fit plots of predicted vs observed pharmacokinetic metrics (AUC & C<sub>max</sub>) in plasma and CSF/ECF in rats ----- 6

### List of Tables

**Table S1:** Physiological parameters - Rat PBPK model ----- 7

**Table S2:** Physiological parameters - Human PBPK model ----- 10

**Table S3:** Physicochemical and Drug Specific Parameters for Acetaminophen, Oxycodone, Lacosamide, Ibuprofen & Levetiracetam ----- 14

(A) Plasma & CSF Concentrations - Acetaminophen

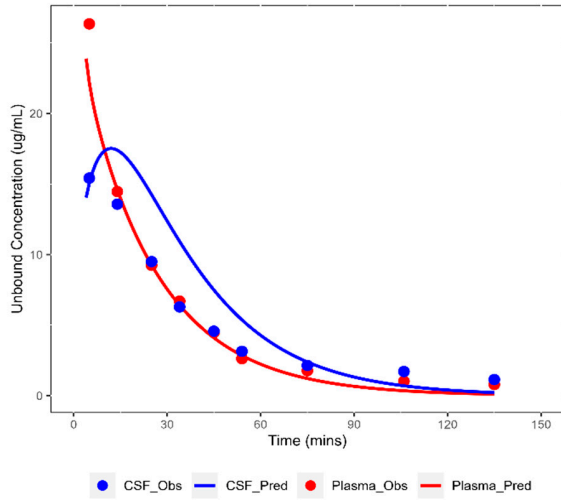

(B) Blood & BM Concentrations - Oxycodone

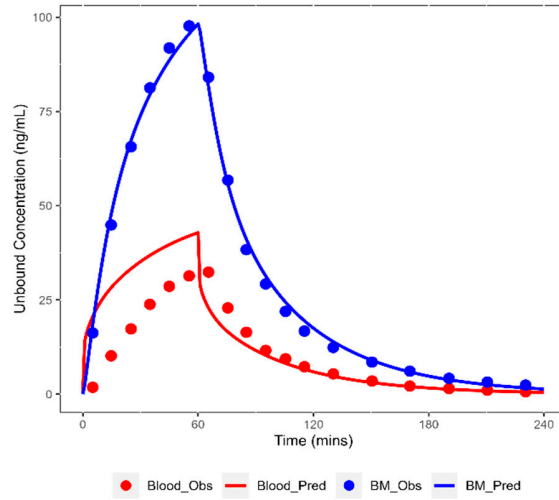

(C) Plasma & BM Concentrations - Lacosamide

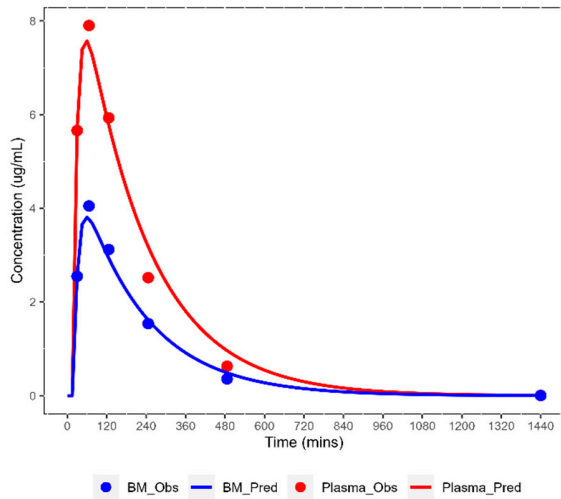

(D) Plasma & BM Concentrations - Ibuprofen

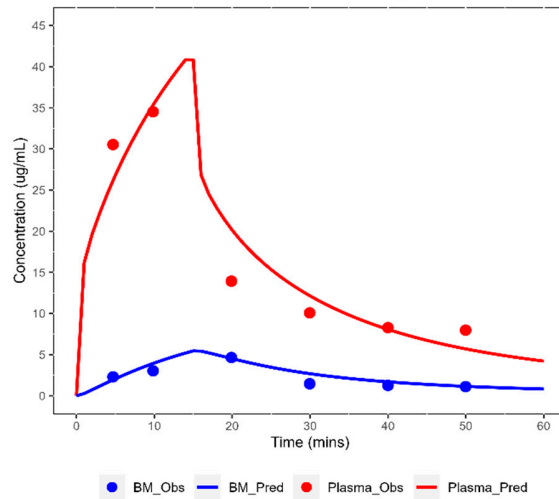

(E) Plasma & ECF Concentrations - Levetiracetam

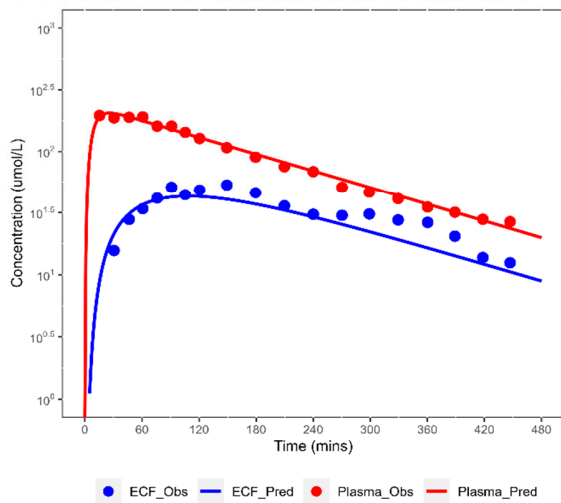

**Figure S1. Simulated versus observed concentration profiles for plasma and CNS in rats.**

**Panel A:** Red solid line represents the simulated unbound plasma concentrations and blue solid line represents the unbound simulated CSF concentrations for the drug acetaminophen. Red and blue dots represent the observed plasma and CSF concentrations respectively, from Sauernheimer et al [40]

**Panel B:** Red solid line represents the simulated unbound blood concentrations and blue solid line represents the unbound simulated Brain Mass (BM) concentrations for the drug oxycodone. Red and blue dots represent the observed blood and BM concentrations respectively, from Ball et al [8]

**Panel C:** Red solid line represents the simulated plasma concentrations and blue solid line represents the simulated BM concentrations for the drug lacosamide. Red and blue dots represent the observed plasma and BM concentrations respectively, from Koo et al [42]

**Panel D:** Red solid line represents the simulated plasma concentrations and blue solid line represents the simulated BM concentrations for the drug ibuprofen. Red and blue dots represent the observed plasma and BM concentrations respectively, from Talhoni et al [44]

**Panel E:** Red solid line represents the simulated plasma concentrations and blue solid line represents the simulated ECF concentrations for the drug levetiracetam - 40mg/kg. Red and blue dots represent the observed plasma and ECF concentrations respectively, from Tong et al [34]

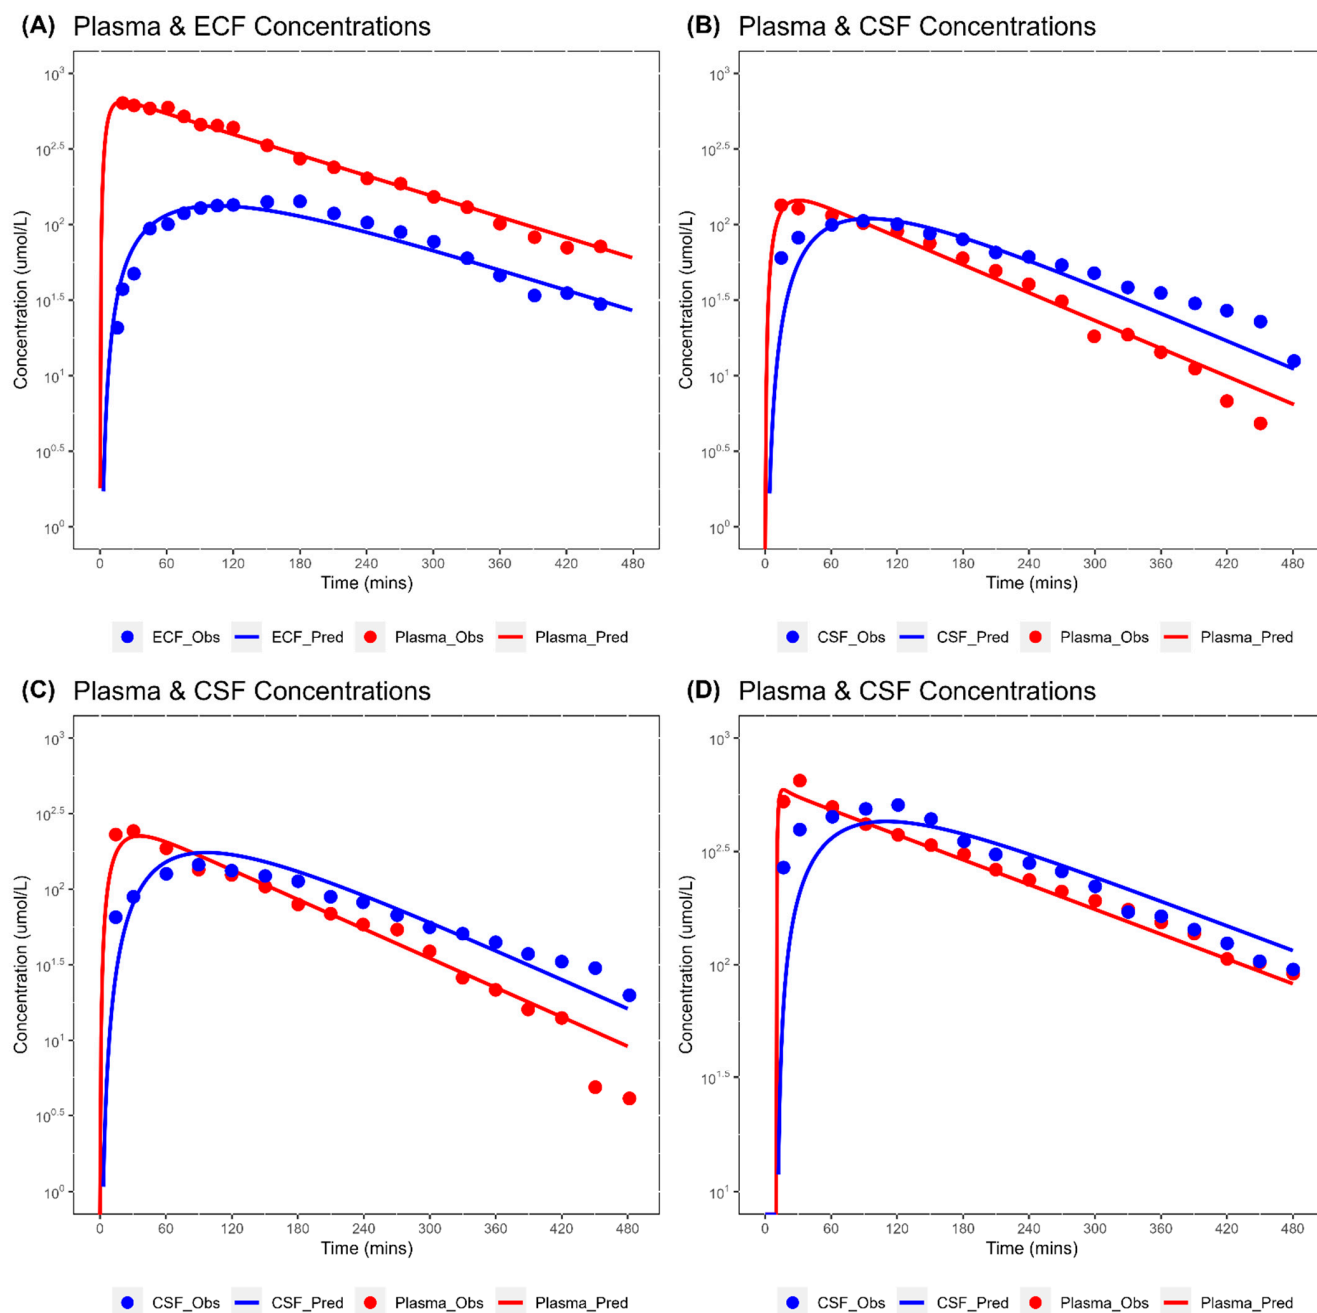

**Figure S2. Simulated versus observed concentration profiles in rats.** Panel A: Red solid line represents the simulated plasma concentrations and blue solid line represents the simulated ECF concentrations for the drug levetiracetam - 80mg/kg doses from a study by Tong et al. [34]. Red and blue dots represent observed plasma and CSF concentrations, respectively from a study by Tong et al. [34]. Panel B, C & D: Red solid line represents the simulated plasma concentrations and blue solid line represents the simulated CSF concentrations for the drug levetiracetam for the 20mg/kg (B), 40mg/kg (C) and 80mg/kg (D) doses respectively from a study by Doheny et al. [46]. Red and blue dots represent observed plasma and CSF concentrations, respectively for the 20mg/kg (B), 40mg/kg (C) and 80mg/kg (D) doses respectively from a study by Doheny et al. [46].

### Observed vs Predicted, PK Metrics - AUC & Cmax

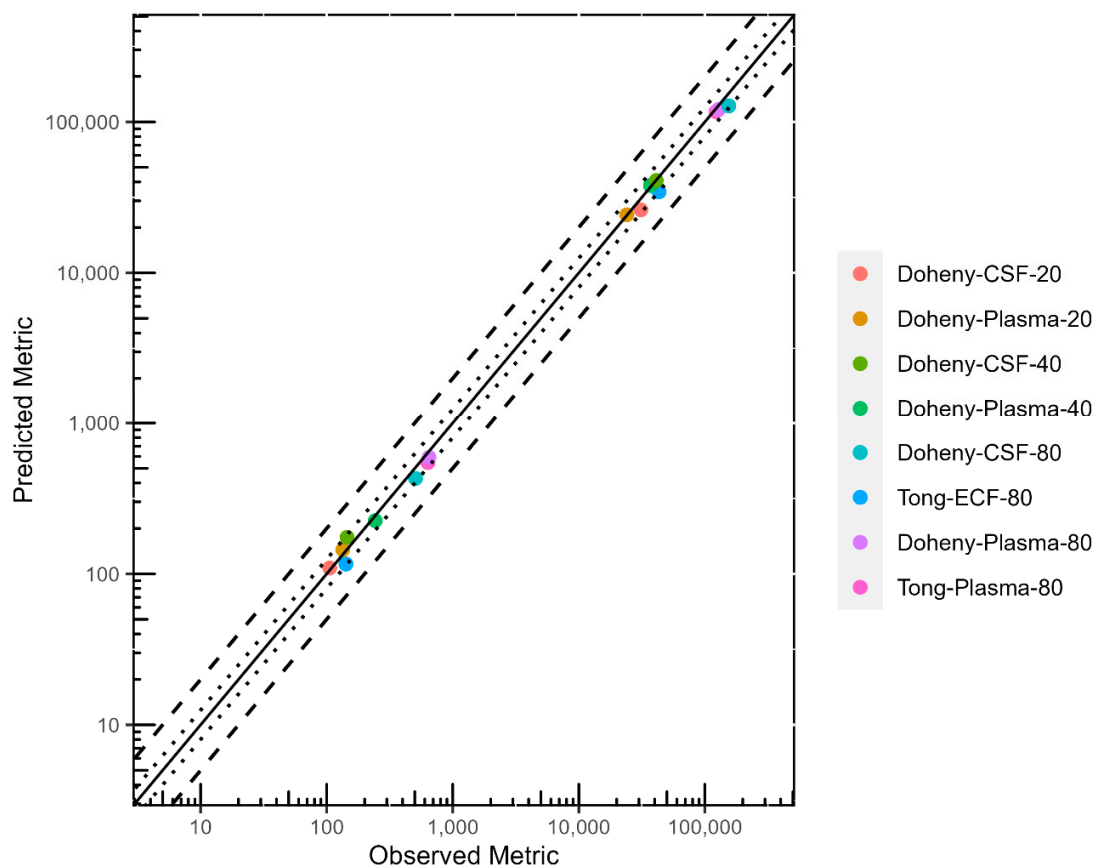

**Figure S3. Goodness-of-fit plots of predicted vs observed pharmacokinetic metrics (AUC & Cmax) in plasma and CSF/ECF in rats.** The line of identity is shown as a solid line; 1.25-fold deviation is shown as a dotted line; 2-fold deviation is shown as a dashed line. The observed data are from both the above studies Doheny [46], Tong [34].

**Table S1.** Physiological parameters - Rat PBPK model

| Parameter                        | Equation / Value                   | Reference |
|----------------------------------|------------------------------------|-----------|
| Hematocrit                       | 0.439                              | [52]      |
| Rat Serum Albumin (g/L)          | 31.14                              | [52]      |
| Weight (g)                       | 250                                | [34]      |
| <b>Volumes (mL)</b>              |                                    |           |
| Parameter                        | Equation / Value                   | Reference |
| <b>Other Organ Compartments:</b> |                                    |           |
| Vlung                            | 1.24                               | [52]      |
| Vadipose                         | 16.66                              | [52]      |
| Vbone                            | 15.68                              | [52]      |
| Vheart                           | 1.05                               | [52]      |
| Vkidney                          | 2.19                               | [52]      |
| Vmuscle                          | 116.13                             | [52]      |
| Vskin                            | 39.41                              | [52]      |
| Vspleen                          | 0.57                               | [52]      |
| Vgut                             | 6.19                               | [52]      |
| Vliver                           | 8.57                               | [52]      |
| Vbla                             | 6.8                                | [91]      |
| Vblv                             | 13.6                               | [91]      |
| Vrest                            | 1.3                                | [91]      |
| <b>Brain Compartments:</b>       |                                    |           |
| Vbrain total                     | 1.24                               | [52]      |
| Vbrain blood                     | $0.0310 * V_{btotal}$              | [52]      |
| Vccsf                            | $0.144 * V_{btotal}$               | [52]      |
| Vscsf                            | $0.18750 * V_{ccsf}$               | [52]      |
| Vecf                             | 0.29                               | [8,52]    |
| Vbrain mass                      | $V_{btotal} - V_{ccsf} - V_{scsf}$ |           |
| <b>Fluid flow rates (mL/min)</b> |                                    |           |
| Parameter                        | Equation / Value                   | Reference |
| <b>Other organ Compartments:</b> |                                    |           |
| Qcarout                          | 80                                 | [52]      |
| Qlung                            | 80                                 | [52]      |
| Qadipose                         | $5.9 * Q_{carout}$                 | [52]      |
| Qbone                            | $10.1 * Q_{carout}$                | [52]      |
| Qheart                           | $4 * Q_{carout}$                   | [52]      |
| Qkidney                          | $14.5 * Q_{carout}$                | [52]      |
| Qmuscle                          | $23.7 * Q_{carout}$                | [52]      |
| Qskin                            | $5.1 * Q_{carout}$                 | [52]      |
| Qspleen                          | $1.1 * Q_{carout}$                 | [52]      |
| Qgut                             | $10.1 * Q_{carout}$                | [52]      |
| Qha                              | $1.6 * Q_{carout}$                 | [91,52]   |
| Qliver                           | $Q_{gut} + Q_{spleen} + Q_{ha}$    | [52]      |
| Qrestflow                        | 1                                  | [52]      |
| <b>Brain Compartment:</b>        |                                    |           |
| Qbrain                           | 1.12                               | [52]      |
| Qproductionrate                  | 0.0026                             | [52]      |

|                               |                                                                                                |                                                                   |                                                                   |            |
|-------------------------------|------------------------------------------------------------------------------------------------|-------------------------------------------------------------------|-------------------------------------------------------------------|------------|
| Qbulk                         | 0.085 * Qproductionrate                                                                        |                                                                   |                                                                   | [52]       |
| Qssink                        | 0.37 * (0.75 * Qproductionrate + Qbulk)                                                        |                                                                   |                                                                   | [52]       |
| Qsout                         | 0.9 * Qssink                                                                                   |                                                                   |                                                                   | [52]       |
| Qsin                          | (Qssink + Qsout)                                                                               |                                                                   |                                                                   | [52]       |
| Qcsink                        | (0.75 * Qproductionrate + Qbulk − Qsin + Qsout)                                                |                                                                   |                                                                   | [52]       |
| Tissue Composition (fraction) |                                                                                                |                                                                   |                                                                   |            |
| Parameter                     | Rowdgers and Rowland                                                                           | Poulin and Theil                                                  | Berezhkovskiy                                                     | Reference  |
| Adipose                       | EW = 0.135<br>IW = 0.017<br>NL = 0.846<br>NP = 0.0016<br>AP = 0.4<br>AR = 0.049<br>LR = 0.068  | FW = 0.152<br>NL = 0.846<br>NP = 0.0016<br>pH = 7                 | FW = 0.152<br>NL = 0.846<br>NP = 0.0016<br>pH = 7                 | [53,56,57] |
| Bone                          | EW = 0.10<br>IW = 0.346<br>NL = 0.017<br>NP = 0.0017<br>AP = 0.67<br>AR = 0.1<br>LR = 0.05     | FW = 0.446<br>IW = 0.346<br>NL = 0.017<br>NP = 0.0017<br>pH = 6.7 | FW = 0.446<br>IW = 0.346<br>NL = 0.017<br>NP = 0.0017<br>pH = 6.7 | [53,56,57] |
| Gut                           | EW = 0.282<br>IW = 0.475<br>NL = 0.038<br>NP = 0.0125<br>AP = 2.41<br>AR = 0.158<br>LR = 0.141 | FW = 0.757<br>NL = 0.038<br>NP = 0.0125<br>pH = 7.16              | FW = 0.757<br>NL = 0.038<br>NP = 0.0125<br>pH = 7.16              | [53,56,57] |
| Heart                         | EW = 0.32<br>IW = 0.456<br>NL = 0.014<br>NP = 0.0111<br>AP = 2.25<br>AR = 0.157<br>LR = 0.16   | FW = 0.776<br>NL = 0.014<br>NP = 0.0111<br>pH = 7.13              | FW = 0.776<br>NL = 0.014<br>NP = 0.0111<br>pH = 7.13              | [53,56,57] |
| Kidney                        | EW = 0.273<br>IW = 0.483<br>NL = 0.012<br>NP = 0.0242<br>AP = 5.03<br>AR = 0.13<br>LR = 0.137  | FW = 0.756<br>NL = 0.012<br>NP = 0.0242<br>pH = 7.31              | FW = 0.756<br>NL = 0.012<br>NP = 0.0242<br>pH = 7.31              | [53,56,57] |
| Liver                         | EW = 0.161<br>IW = 0.573<br>NL = 0.014<br>NP = 0.024<br>AP = 4.56<br>AR = 0.086<br>LR = 0.161  | FW = 0.734<br>NL = 0.0138<br>NP = 0.024<br>pH = 7.03              | FW = 0.734<br>NL = 0.0138<br>NP = 0.024<br>pH = 7.03              | [53,56,57] |
| Lung                          | EW = 0.336<br>IW = 0.446                                                                       | FW = 0.782<br>NL = 0.0219                                         | FW = 0.782<br>NL = 0.0219                                         | [53,56,57] |

|        |                                                                                                 |                                                       |                                                       |            |
|--------|-------------------------------------------------------------------------------------------------|-------------------------------------------------------|-------------------------------------------------------|------------|
|        | NL = 0.022<br>NP = 0.0128<br>AP = 3.91<br>AR = 0.212<br>LR = 0.168                              | NP = 0.0128<br>pH = 7.36                              | NP = 0.0128<br>pH = 7.36                              |            |
| Muscle | EW = 0.118<br>IW = 0.63<br>NL = 0.01<br>NP = 0.0072<br>AP = 1.53<br>AR = 0.064<br>LR = 0.059    | FW = 0.748<br>NL = 0.01<br>NP = 0.0072<br>pH = 6.27   | FW = 0.748<br>NL = 0.01<br>NP = 0.0072<br>pH = 6.27   | [53,56,57] |
| Skin   | EW = 0.382<br>IW = 0.291<br>NL = 0.06<br>NP = 0.0044<br>AP = 1.32<br>AR = 0.277<br>LR = 0.096   | FW = 0.673<br>NL = 0.06<br>NP = 0.0044<br>pH = 6.27   | FW = 0.673<br>NL = 0.06<br>NP = 0.0044<br>pH = 6.27   | [53,56,57] |
| Spleen | EW = 0.207<br>IW = 0.579<br>NL = 0.0077<br>NP = 0.0113<br>AP = 3.18<br>AR = 0.097<br>LR = 0.207 | FW = 0.786<br>NL = 0.0077<br>NP = 0.0113<br>pH = 6.27 | FW = 0.786<br>NL = 0.0077<br>NP = 0.0113<br>pH = 6.27 | [53,56,57] |
| Plasma | EW = 0.945<br>IW = 0.0<br>NL = 0.0023<br>NP = 0.0013<br>AP = 0.057<br>AR = NA<br>LR = NA        | FW = 0.945<br>NL = 0.0023<br>NP = 0.0013<br>pH = 7.4  | FW = 0.945<br>NL = 0.0023<br>NP = 0.0013<br>pH = 7.4  | [53,56,57] |

**EW:** Extracellular Water, **IW:** Intracellular Water, **NL:** Neutral Lipids, **NP:** Neutral Phospholipids, **AP:** Acidic Phospholipids, **AR:** Albumin ratio, **LR:** lipoprotein ratio

**Table S2.** Physiological parameters - Human PBPK model

| Parameter                        | Equation / Value                                                                                               |                                                  | Reference |
|----------------------------------|----------------------------------------------------------------------------------------------------------------|--------------------------------------------------|-----------|
| Hematocrit                       | Male: 0.43, CV (%): 6.5                                                                                        |                                                  | [52]      |
|                                  | Female: 0.38, CV (%): 7.1                                                                                      |                                                  |           |
| Human Serum Albumin (g/L)        | 45                                                                                                             |                                                  | [52]      |
| Height                           | Male: $175.32 + 0.1113 * age - 0.0025 * age^2$<br>CV (%): 3.9                                                  |                                                  | [28,52]   |
|                                  | Female: $161.66 + 0.1319 * age - 0.0027 * age^2$<br>CV (%): 3.9                                                |                                                  |           |
| Weight                           | Male: $\exp(2.643 + 0.0099 * Height)$<br>CV (%): 15                                                            |                                                  | [28,52]   |
|                                  | Female: $\exp(2.7383 + 0.0091 * Height)$<br>CV (%): 18.8                                                       |                                                  |           |
| Body Surface Area                | $0.007184 * Height^{0.725} * Weight^{0.425}$                                                                   |                                                  | [28,52]   |
| <b>Volumes (L)</b>               |                                                                                                                |                                                  |           |
| Parameter                        | Equation / Value                                                                                               | Notes                                            | Reference |
| <b>Other Organ Compartments:</b> |                                                                                                                |                                                  |           |
| Vlung                            | Male: $((29.08 * (Height/100) * Weight^{0.5} + 11.06 + 35.47 * (Height/100) * Weight^{0.5} + 5.53)/1000)/1.05$ |                                                  | [28,52]   |
|                                  | Female: $((31.46 * (Height/100) * Weight^{0.5} + 1.43 + 35.3 * (Height/100) * Weight^{0.5} + 1.53)/1000)/1.05$ |                                                  |           |
| Vadipose                         | Male: $(1.36 * Weight)/(Height/100) - 42$                                                                      |                                                  | [28,52]   |
|                                  | Female: $(1.61 * Weight)/(Height/100) - 38.3$                                                                  |                                                  |           |
| Vbone                            | Male: $((Weight - Vadipose * 0.92)/1.3 * 0.058)$                                                               |                                                  | [28,52]   |
|                                  | Female: $((Weight - Vadipose * 0.92)/1.3 * 0.051)$                                                             |                                                  |           |
| Vheart                           | Male: $((155.18 * (BSA)^{1.29}/1000)/1.05)$                                                                    |                                                  | [28,52]   |
|                                  | Female: $((124.13 * (BSA)^{1.242}/1000)/1.05)$                                                                 |                                                  |           |
| Vkidney                          | $((15.4 + 2.04 * Weight + 51.8 * (Height/100)^2)/1000)/1.05$                                                   |                                                  | [28,52]   |
| Vmuscle                          | Male: $(0.244 * Weight + 7.8 * (Height/100) - 0.098 * age + 3.3)/1.04$                                         |                                                  | [28,52]   |
|                                  | Female: $(0.244 * Weight + 7.8 * (Height/100) - 0.098 * age - 3.3)/1.04$                                       |                                                  |           |
| Vskin                            | $(BSA/1000) * 45.655 + (BSA/1000) * 1240$                                                                      | Skin thickness was derived from SimCYP simulator | [28,52]   |
| Vspleen                          | $(6.516 * Weight^{0.797})/1000$                                                                                |                                                  | [28,52]   |
| Vgut                             | Male: $0.021 * (Weight - Vadipose * 0.92)/1.05$                                                                |                                                  | [28,52]   |
|                                  | Female: $0.027 * (Weight - Vadipose * 0.92)/1.05$                                                              |                                                  |           |
| Vliver                           | $(1072.8 * (BSA) - 345.7)/1000$                                                                                |                                                  | [28,52]   |
| Vbla                             | Male: $((13.1 * Height + 18.05 * Weight - 480)/0.5723)/1000)/2$                                                |                                                  | [28,52]   |
|                                  | Female: $((35.5 * Height + 2.27 * Weight - 3382)/0.6178)/1000)/2$                                              |                                                  |           |
| Vblv                             | Male: $((13.1 * Height + 18.05 * Weight - 480)/0.5723)/1000)/2$                                                |                                                  | [28,52]   |

|                                      |                                                                                                                           |                                                              |                  |
|--------------------------------------|---------------------------------------------------------------------------------------------------------------------------|--------------------------------------------------------------|------------------|
|                                      | Female:<br>$((35.5 * Height + 2.27 * Weight - 3382)/0.6178)/1000)/2$                                                      |                                                              |                  |
| Vrest                                | $Weight - Vblv - Vbla - Vliver - Vgut - Vspleen - Vskin - Vmuscle - Vkidney - Vheart - Vbone - Vadipose - Vlung - Vbrain$ | Body density of 1 kg/L assumed                               | -                |
| <b>Brain Compartments:</b>           |                                                                                                                           |                                                              |                  |
| Vbrain total                         | $(1.449 - 3.62/BW)/1.04$                                                                                                  |                                                              | [28,52]          |
| Vbrain blood                         | $0.05 * Vbraintotal$                                                                                                      |                                                              | [28,52]          |
| Vccsf                                | Male: $Vbrainmale * 0.105 * 0.8$<br>Female: $Vbrainfemale * 0.092 * 0.8$                                                  |                                                              | [28,52]          |
| Vscsf                                | Male: $Vbrainmale * 0.105 * 0.2$<br>Female: $Vbrainfemale * 0.092 * 0.2$                                                  | Vscsf capped at 20% of the total csf                         | [28,52]          |
| Vendothelial mass                    | $Vbrainmale * 0.005$                                                                                                      |                                                              | [28,52]          |
| Vbrain mass                          | $Vbrain - Vbrainendo - Vbb - Vccsf - Vscsf$                                                                               |                                                              | [28,52]          |
| <b>Fluid flow rates (L/hr)</b>       |                                                                                                                           |                                                              |                  |
| <b>Parameter</b>                     | <b>Equation / Value</b>                                                                                                   | <b>Notes</b>                                                 | <b>Reference</b> |
| <b>Other organ Compartments:</b>     |                                                                                                                           |                                                              |                  |
| Qcarout                              | $BSA * 60 * (3 - 0.01 * (age - 20))$                                                                                      | Cardiac output * fractional tissue flow                      | [28,52]          |
| Qlung                                | $Qcarout * 1$                                                                                                             |                                                              | [28,52]          |
| Qadipose                             | Male: $Qcarout * 0.05$<br>Female: $Qcarout * 0.085$                                                                       |                                                              | [28,52]          |
| Qbone                                | $Qcarout * 0.05$                                                                                                          |                                                              | [28,52]          |
| Qheart                               | Male: $Qcarout * 0.04$<br>Female: $Qcarout * 0.05$                                                                        |                                                              | [28,52]          |
| Qkidney                              | Male: $Qcarout * 0.19$<br>Female: $Qcarout * 0.17$                                                                        |                                                              | [28,52]          |
| Qmuscle                              | Male: $Qcarout * 0.17$<br>Female: $Qcarout * 0.12$                                                                        |                                                              | [28,52]          |
| Qskin                                | $Qcarout * 0.05$                                                                                                          |                                                              | [28,52]          |
| Qspleen                              | Male: $Qcarout * 0.02$<br>Female: $Qcarout * 0.03$                                                                        |                                                              | [28,52]          |
| Qgut                                 | Male: $Qcarout * 0.15$<br>Female: $Qcarout * 0.17$                                                                        |                                                              | [28,52]          |
| Qha                                  | $Qcarout * 0.065$                                                                                                         |                                                              | [28,52]          |
| Qliver                               | Male: $Qcarout * 0.235$<br>Female: $Qcarout * 0.265$                                                                      |                                                              | [28,52]          |
| Qrestflow                            | Male: $Qcarout * 0.095$<br>Female: $Qcarout * 0.09$                                                                       | Qcarout – organ flows                                        | [28,52]          |
| <b>Brain Compartment:</b>            |                                                                                                                           |                                                              |                  |
| Qbrain                               | $Qcarout * 0.12$                                                                                                          | Cardiac output * fractional tissue flow                      | [52,59]          |
| Qproductionrate                      | 0.021, CV (%): 10                                                                                                         |                                                              | [52,59]          |
| Qbulk                                | $0.25 * Qproductionrate$ , CV (%): 8                                                                                      | Assumed: Relative CSF flows (as part of Qcsfproduction rate) | [52,59]          |
| Qssink                               | $0.38 * (0.75 * Qproductionrate + Qbulk)$ , CV (%): 30                                                                    |                                                              | [52,59]          |
| Qsout                                | $0.9 * Qssink$ , CV (%): 100%                                                                                             |                                                              | [52,59]          |
| Qsin                                 | $(Qssink + Qsout)$                                                                                                        |                                                              | [52,59]          |
| Qcsink                               | $(0.75 * Qproductionrate + Qbulk - Qsin + Qsout)$                                                                         |                                                              | [52,59]          |
| <b>Tissue Composition (fraction)</b> |                                                                                                                           |                                                              |                  |

| Parameter | Rowdgers and Rowland                                                                            | Poulin and Theil                                     | Berezhkovskiy                                        | Reference  |
|-----------|-------------------------------------------------------------------------------------------------|------------------------------------------------------|------------------------------------------------------|------------|
| Adipose   | EW = 0.141<br>IW = 0.039<br>NL = 0.79<br>NP = 0.002<br>AP = 0.4<br>AR = 0.037<br>LR = 0.068     | FW = 0.18<br>NL = 0.79<br>NP = 0.002<br>pH = 7       | FW = 0.18<br>NL = 0.79<br>NP = 0.002<br>pH = 7       | [53,56,57] |
| Bone      | EW = 0.098<br>IW = 0.341<br>NL = 0.074<br>NP = 0.0011<br>AP = 0.67<br>AR = 0.1<br>LR = 0.05     | FW = 0.439<br>NL = 0.074<br>NP = 0.0011<br>pH = 7    | FW = 0.439<br>NL = 0.074<br>NP = 0.0011<br>pH = 7    | [53,56,57] |
| Gut       | EW = 0.267<br>IW = 0.451<br>NL = 0.0487<br>NP = 0.0163<br>AP = 2.84<br>AR = 0.158<br>LR = 0.141 | FW = 0.718<br>NL = 0.0487<br>NP = 0.0163<br>pH = 7   | FW = 0.718<br>NL = 0.0487<br>NP = 0.0163<br>pH = 7   | [53,56,57] |
| Heart     | EW = 0.313<br>IW = 0.445<br>NL = 0.0115<br>NP = 0.0166<br>AP = 3.07<br>AR = 0.157<br>LR = 0.16  | FW = 0.758<br>NL = 0.0115<br>NP = 0.0166<br>pH = 7   | FW = 0.758<br>NL = 0.0115<br>NP = 0.0166<br>pH = 7   | [53,56,57] |
| Kidney    | EW = 0.283<br>IW = 0.50<br>NL = 0.0207<br>NP = 0.0162<br>AP = 2.48<br>AR = 0.13<br>LR = 0.137   | FW = 0.783<br>NL = 0.0207<br>NP = 0.0162<br>pH = 7.2 | FW = 0.783<br>NL = 0.0207<br>NP = 0.0162<br>pH = 7.2 | [53,56,57] |
| Liver     | EW = 0.165<br>IW = 0.586<br>NL = 0.0348<br>NP = 0.0252<br>AP = 5.09<br>AR = 0.086<br>LR = 0.161 | FW = 0.751<br>NL = 0.0348<br>NP = 0.0252<br>pH = 7   | FW = 0.751<br>NL = 0.0348<br>NP = 0.0252<br>pH = 7   | [53,56,57] |
| Lung      | EW = 0.348<br>IW = 0.463<br>NL = 0.003<br>NP = 0.009<br>AP = 0.5<br>AR = 0.212<br>LR = 0.168    | FW = 0.811<br>NL = 0.003<br>NP = 0.009<br>pH = 6.7   | FW = 0.811<br>NL = 0.003<br>NP = 0.009<br>pH = 6.7   | [53,56,57] |
| Muscle    | EW = 0.091<br>IW = 0.669<br>NL = 0.0238<br>NP = 0.0072<br>AP = 2.49<br>AR = 0.034<br>LR = 0.059 | FW = 0.76<br>NL = 0.0238<br>NP = 0.0072<br>pH = 7    | FW = 0.76<br>NL = 0.0238<br>NP = 0.0072<br>pH = 7    | [53,56,57] |
| Skin      | EW = 0.623<br>IW = 0.0947<br>NL = 0.0284                                                        | FW = 0.7177<br>NL = 0.0284<br>NP = 0.0111            | FW = 0.7177<br>NL = 0.0284<br>NP = 0.0111            | [53,56,57] |

|        |                                                                                                 |                                                      |                                                      |            |
|--------|-------------------------------------------------------------------------------------------------|------------------------------------------------------|------------------------------------------------------|------------|
|        | NP = 0.0111<br>AP = 1.32<br>AR = 0.277<br>LR = 0.096                                            | pH = 7                                               | pH = 7                                               |            |
| Spleen | EW = 0.208<br>IW = 0.579<br>NL = 0.0201<br>NP = 0.0198<br>AP = 2.81<br>AR = 0.097<br>LR = 0.207 | FW = 0.787<br>NL = 0.0201<br>NP = 0.0198<br>pH = 7   | FW = 0.787<br>NL = 0.0201<br>NP = 0.0198<br>pH = 7   | [53,56,57] |
| Plasma | EW = 0.945<br>IW = 0<br>NL = 0.0035<br>NP = 0.0023<br>AP = 0.04<br>AR = NA<br>LR = NA           | FW = 0.945<br>NL = 0.0035<br>NP = 0.0023<br>pH = 7.4 | FW = 0.945<br>NL = 0.0035<br>NP = 0.0023<br>pH = 7.4 | [53,56,57] |

**EW:** Extracellular Water, **IW:** Intracellular Water, **NL:** Neutral Lipids, **NP:** Neutral Phospholipids, **AP:** Acidic Phospholipids, **AR:** Albumin ratio, **LR:** lipoprotein ratio

**Table S3.** Physicochemical and Drug Specific Parameters for Acetaminophen, Oxycodone, Lacosamide, Ibuprofen & Levetiracetam.

| Drug                         |               | Acetaminophen           |               | Oxycodone              |               | Lacosamide                   |               | Ibuprofen                      |               | Levetiracetam           |               |
|------------------------------|---------------|-------------------------|---------------|------------------------|---------------|------------------------------|---------------|--------------------------------|---------------|-------------------------|---------------|
|                              |               | Parameter               | Ref.          | Parameter              | Ref.          | Parameter                    | Ref.          | Parameter                      | Ref.          | Parameter               | Ref.          |
| Molecular weight (g/mol)     |               | 151.2                   | [28,59]       | 315.4                  | [31]          | 250.3                        | [31]          | 206.285                        | [92]          | 170.21                  | [93]          |
| Log P                        |               | 0.46                    | [28,59]       | 1.2                    | [31]          | 0.3                          | [31]          | 3.97                           | [92]          | -0.67                   | [94]          |
| Pka                          |               | 9.38                    | [28,59]       | 8.53                   | [31]          | 12.4                         | [31]          | 4.91                           | [92]          | 15.74                   | [94]          |
| Compound Type                |               | Monoprotic acid [28,59] |               | Monoprotic base [31]   |               | Neutral [31]                 |               | Monoprotic acid [92]           |               | Neutral [58]            |               |
| Kp Method                    |               | Rodgers & Rowland [59]  |               | Poulin & Theil         |               | Rodgers & Rowland [31]       |               | Berezhkovskiy                  |               | Rodgers & Rowland       |               |
| BCS Classification           |               | III                     | [95]          | I or III               | [96]          | I                            | [97]          | II                             | [98]          | I                       | [99]          |
| CL - Human (L/hr)            |               | 22.8<br>CV(%):35.4      | [59]          | 49.2<br>CV (%):30      | [31]          | 2.13<br>CV (%):30            | [31]          | 3.88<br>CV (%):30              | [38]          | 3.96<br>CV(%):42        | [93]          |
| CL-scalar                    |               | -                       | -             | 0.8                    | #             | 0.8                          | #             | -                              | -             | -                       | -             |
| BP                           | Rats          | 1                       | [100]         | 1.3                    | [8]           | 1                            | [42]          | 0.55                           | [101]         | 1.05                    | [34]          |
|                              | Humans        | 1.09                    | [28,59]       | 1.3                    | [31]          | 1                            | [31]          | 1                              | [31]          | 0.85                    | [102]         |
| Fupl                         | Rats          | 0.88                    | [100]         | 0.56                   | [8]           | 0.96                         | [42]          | 0.04                           | [103]         | 0.9-1                   | [104]         |
|                              | Humans        | 0.855                   | [28,59]       | 0.59                   | [31]          | 1                            | [31]          | (0.00567+ 0.0107)/2 [105,106]  |               | 0.95                    | [104]         |
| Fubm                         | Rats          | 0.83                    | [107]         | 0.39                   | [8]           | 0.899                        | [108]         | 0.3117 - Assumed same as human |               | 0.98                    | [46]          |
|                              | Humans        | 0.747                   | [107]         | 0.45                   | [8]           | 0.899 - Assumed same as rats |               | 0.3117                         | [109]         | 0.98                    | $\gamma$      |
| Fuccsf                       |               | 1                       | *             | 1                      | *             | 1                            | *             | 1                              | *             | 1                       | *             |
| Fuscsf                       |               | 1                       | **            | 1                      | **            | 1                            | **            | 1                              | **            | 1                       | **            |
| P <sub>BBB</sub> (cm/sec)    |               | 11.11×10 <sup>-6</sup>  | #             | 26.79×10 <sup>-6</sup> | #             | 18.8×10 <sup>-6</sup>        | #             | 35.138×10 <sup>-6</sup>        | #             | 1.5295×10 <sup>-6</sup> | #             |
| PS <sub>B</sub>              | Rats (ml/min) | 0.179                   | #             | 0.434                  | #             | 0.305                        | #             | 0.569                          | #             | 0.02456                 | #             |
|                              | Humans (L/hr) | 5.98                    | #             | 14.47                  | #             | 10.15                        | #             | 18.97                          | #             | 0.8187                  | #             |
| PS <sub>E</sub> (Brain-CCSF) | Rats (ml/min) | 80                      | ##            | 80                     | ##            | 80                           | ##            | 80                             | ##            | 80                      | ##            |
|                              | Humans (L/hr) | 300                     | ##            | 300                    | ##            | 300                          | ##            | 300                            | ##            | 300                     | ##            |
| PSc (BCSFB)                  | Rats (ml/min) | 0.0179                  | [59], $\beta$ | 0.0434                 | [59], $\beta$ | 0.0305                       | [59], $\beta$ | 0.0569                         | [59], $\beta$ | 0.002456                | [59], $\beta$ |
|                              | Humans (L/hr) | 0.598                   | [59], $\beta$ | 1.447                  | [59], $\beta$ | 1.015                        | [59], $\beta$ | 1.897                          | [59], $\beta$ | 0.08187                 | [59], $\beta$ |

**PS<sub>B</sub>, PS<sub>C</sub> and PS<sub>E</sub>:** permeability surface area products between brain blood and brain mass, brain blood and cranial CSF respectively; **Fubm, Fupl, Fuccsf, Fuscsf:** Fraction unbound in brain mass, plasma, cranial CSF and spinal CSF respectively; **CL:** clearance; **BP:** Blood to plasma ratio; **BCS:** Biopharmaceutical classification system

$\gamma$  Assumed (low conc. of protein than plasma)  
\* Assumed (low conc. of protein in Cranial-CSF);  
\*\* Assumed (low conc. of protein in Spinal-CSF);  
# Optimized using Rat PBPK Model / Human PBPK Model,  
## Assumed to be no barrier  
 $\beta$  Assumed to be 1/10th of  $PS_B$ .
