# Supplementary material for: Interspecies Brain PBPK Modeling Platform to Predict Passive Transport through the Blood–Brain Barrier and Assess Target Site Disposition
Source: MDPI journal article supplement (doi:10.3390/pharmaceutics16020226), 2024-02-04
Supplement: s1 [file s1]

*Article*

# Interspecies Brain PBPK Modeling Platform to Predict Passive Transport through the Blood-Brain Barrier and Assess Target-Site Disposition

## Supplementary Materials

**Parsshava Mehta <sup>1</sup>, Amira Soliman <sup>1,2</sup>, Leyanis Rodriguez-Vera <sup>3</sup>, Stephan Schmidt <sup>1</sup>, Paula Muniz <sup>3</sup>, Monica Rodriguez <sup>3</sup>, Marta Forcadell <sup>4</sup>, Emili Gonzalez-Perez <sup>4</sup> and Valvanera Vozmediano <sup>1,3\*</sup>**

<sup>1</sup> Center for Pharmacometrics and Systems Pharmacology, Department of Pharmaceutics, College of Pharmacy, University of Florida, Orlando, FL 32827, USA; parsshava.mehta@ufl.edu (P.M.); amira.soliman@ufl.edu (A.S.); sschmidt@cop.ufl.edu (S.S.)

<sup>2</sup> Department of Pharmacy Practice, Faculty of Pharmacy, Helwan University, Helwan 11795, Egypt

<sup>3</sup> Model Informed Development, CTI Laboratories, Covington, KY 41011, USA; lrodriguez@ctifacts.com (L.R.-V.); pmuniz@ctifacts.com (P.M.); mrodriguez@ctifacts.com (M.R.)

<sup>4</sup> Neuraxpharm Pharmaceuticals SL, Clinical Research and Evidence-Generation Science, 08970 Barcelona, Spain; forcadellmarta@gmail.com (M.F.); emiligonzalezperez@gmail.com (E.G.-P.)

\* Correspondence: valva@ufl.edu or vvozmediano@ctifacts.com

## Julia Code for PBPK Model in Rats

*## PBPK model in Rats – Drug (Example Code – Not for any specific drug)*

*## Load necessary libraries*

using Random, Pumas, PumasUtilities, CairoMakie, PumasPlots, Serialization, GlobalSensitivity, Random, Weave, CSV, Latexify, Chain, HTTP, AlgebraOfGraphics, DataFramesMeta, CategoricalArrays

## Drug Specific Parameters ## -----

Molecular\_Weight = \_\_\_\_

##Blood to Plasma Ratio

BP\_rat = \_\_\_\_ # Blood to Plasma Ratio

##Unbound Fraction of drug

Fubm\_rat = \_\_\_\_ # Fraction unbound in brain mass

Fupl\_rat = \_\_\_\_ # Fraction unbound in plasma

Fubb\_rat = Fupl\_rat/BP\_rat # Fraction unbound in blood

Fuccsf\_rat = \_\_\_\_ # Fraction unbound in cranial CSF

Fuscsf\_rat = \_\_\_\_ # Fraction unbound in spinal CSF

##Physico Chemical Properties

LogP = \_\_\_\_

pKa = \_\_\_\_

Type\_of\_compound = \_\_\_\_ # 1-Neutral, 2-Monoprotic Acid, 3-Monoprotic Base

##Calculation of KP Methods

## Rodgers and Rowland

```

rat_RR = CSV.File("/home/jrun/data/code/UF_LabLesvi/Data_IN/Kp_Methods/rat_RR.csv",
                 missingstring=["", "NA", "."])
rat_RR_df = DataFrame(rat_RR)

function calcKp_RR(logP, pKa, fup, BP, type, P_ow_calc, dat::DataFrame)

    dat_all = dat[findall(in(["Bone", "Gut", "Heart", "Kidney", "Liver", "Lung", "Muscle", "Pancreas", "Skin", "Spleen"]), dat.tissue), :] #df except
    Adipose, RBC and Plasma

    dat_ad = filter(row -> row.tissue == ("Adipose"), dat)    #df for Adipose
    dat_rbc = filter(row -> row.tissue == ("RBCs"), dat)      #df for RBCs
    dat_plas = filter(row -> row.tissue == ("Plasma"), dat)    #df for Plasma

    pH_IW = 6.9      #pH of intracellular tissue water
    pH_P = 7.4       #pH of plasma
    pH_RBC = 7.27    #pH of blood cells
    P = 10^(logP)    #Octanol:water partition coefficient

    #logP_OW calculation, Oil:Water partition coefficient
    if P_ow_calc == 1
        logP_OW = 1.115*logP - 1.35    #Hansch Equation
    else
        logP_OW = -4.653+((7.972/(1+10^(0.1175-0.2849*logP)))) #Bartels et al
    end

    P_OW = 10^(logP_OW)

```

$$\#K_a = 10^{(-pK_a)}$$

$$HCT = 0.439 \quad \#Hematocrit$$

$$K_{pu\_bc} = (HCT - 1 + BP)/(HCT * f_{up})$$

#Calculate X value

if type==1      #Neutral

$$X = 0$$

elseif type==2    #Monoprotic Acid

$$X = 10^{(pH\_IW - pK_a)}$$

elseif type==3    #Monoprotic Base

$$X = 10^{(pK_a - pH\_IW)}$$

elseif type==4    #Diprotic Acid

$$X = 10^{(pH\_IW - pK_a[1])} + 10^{(2 * pH\_IW - pK_a[1] - pK_a[2])}$$

elseif type==5    #Diprotic Base

$$X = 10^{(pK_a[2] - pH\_IW)} + 10^{(pK_a[1] + pK_a[2] - 2 * pH\_IW)}$$

elseif type==6    #Monoprotic acid and Monoprotic base (acid comes first)

$$X = 10^{(pK_a[2] - pH\_IW)} + 10^{(pH\_IW - pK_a[1])}$$

elseif type==7    #Triprotic Acid

$$X = 10^{(pH\_IW - pK_a[1])} + 10^{(2 * pH\_IW - pK_a[1] - pK_a[2])} + 10^{(3 * pH\_IW - pK_a[1] - pK_a[2] - pK_a[3])}$$

elseif type==8    #Triprotic Base

$$X = 10^{(pK_a[3] - pH\_IW)} + 10^{(pK_a[3] + pK_a[2] - 2 * pH\_IW)} + 10^{(pK_a[1] + pK_a[2] + pK_a[3] - 3 * pH\_IW)}$$

elseif type==9    #Diprotic acid and Monoprotic base (first two are acid)

$$X = 10^{(pK_a[3] - pH\_IW)} + 10^{(pH\_IW - pK_a[1])} + 10^{(2 * pH\_IW - pK_a[1] - pK_a[2])}$$

```

elseif type==10 #Monoprotic acid and Diprotic base (first one is acid)

    X = 10^(pH_IW-pKa[1])+10^(pKa[3]-pH_IW)+10^(pKa[2]+pKa[3]-2*pH_IW)

else

    X = "Type of Compound Not specified Correctly"

end

```

#Calculate Y value

```

if type==1      #Neutral

    Y = 0

elseif type==2  #Monoprotic Acid

    Y = 10^(pH_P-pKa)

elseif type==3  #Monoprotic Base

    Y = 10^(pKa-pH_P)

elseif type==4  #Diprotic Acid

    Y = 10^(pH_P-pKa[1])+10^(2*pH_P-pKa[1]-pKa[2])

elseif type==5  #Diprotic Base

    Y = 10^(pKa[2]-pH_P)+10^(pKa[1]+pKa[2]-2*pH_P)

elseif type==6  #Monoprotic acid and Monoprotic base (acid comes first)

    Y = 10^(pKa[2]-pH_P)+10^(pH_P-pKa[1])

elseif type==7  #Triprotic Acid

    Y = 10^(pH_P-pKa[1])+10^(2*pH_P-pKa[1]-pKa[2])+10^(3*pH_P-pKa[1]-pKa[2]-pKa[3])

elseif type==8  #Triprotic Base

    Y = 10^(pKa[3]-pH_P)+10^(pKa[3]+pKa[2]-2*pH_P)+10^(pKa[1]+pKa[2]+pKa[3]-3*pH_P)

elseif type==9  #Diprotic acid and Monoprotic base (first two are acid)

```

```

Y = 10^(pKa[3]-pH_P)+10^(pH_P-pKa[1])+10^(2*pH_P-pKa[1]-pKa[2])
elseif type==10 #Monoprotic acid and Diprotic base (first one is acid)
Y = 10^(pH_P-pKa[1])+10^(pKa[3]-pH_P)+10^(pKa[2]+pKa[3]-2*pH_P)
else
Y = "Type of Compound Not specified Correctly"
end

#Calculate Z value
if type==1 #Neutral
Z = 1
elseif type==2 #Monoprotic Acid
Z = 1
elseif type==3 #Monoprotic Base
Z = 10^(pKa-pH_RBC)
elseif type==4 #Diprotic Acid
Z = 1
elseif type==5 #Diprotic Base
Z = 10^(pKa[2]-pH_RBC)+10^(pKa[1]+pKa[2]-2*pH_RBC)
elseif type==6 #Monoprotic acid and Monoprotic base (acid comes first)
Z = 10^(pKa[2]-pH_RBC)+10^(pH_RBC-pKa[1])
elseif type==7 #Triprotic Acid
Z = 1
elseif type==8 #Triprotic Base
Z = 10^(pKa[3]-pH_RBC)+10^(pKa[3]+pKa[2]-2*pH_RBC)+10^(pKa[1]+pKa[2]+pKa[3]-3*pH_RBC)

```

```
elseif type==9    #Diprotic acid and Monoprotic base (first two are acid)
```

```
    Z = 10^(pKa[3]-pH_RBC)+10^(pH_RBC-pKa[1])+10^(2*pH_RBC-pKa[1]-pKa[2])
```

```
elseif type==10   #Monoprotic acid and Diprotic base (first one is acid)
```

```
    Z = 10^(pH_RBC-pKa[1])+10^(pKa[3]-pH_RBC)+10^(pKa[2]+pKa[3]-2*pH_RBC)
```

```
else
```

```
    Z = "Type of Compound Not specified Correctly"
```

```
end
```

```
    Ka_AP = (Kpu_bc - (1 + Z)/(1 + Y)*dat_rbc[1,:f_iw] - (P*dat_rbc[1,:f_n_l] + (0.3*P + 0.7)*dat_rbc[1,:f_n_pl])/(1 + Y)) * (1 + Y)/dat_rbc[1,:f_a_pl]/Z
```

```
    Ka_PR = ((1/fup) - 1 - ((P*dat_plas[1,:f_n_l] + (0.3*P + 0.7)*dat_plas[1,:f_n_pl])/(1+Y)))
```

```
# Assign the neutral type_calc=3, moderate to strong bases type_calc=1 and everything else type_calc=2
```

```
if type==1
```

```
    type_calc = 3
```

```
elseif (type==3 && pKa>7)
```

```
    type_calc = 1
```

```
elseif (type==5 && pKa>7)
```

```
    type_calc = 1
```

```
elseif (type==6 && pKa[2] > 7)
```

```
    type_calc = 1
```

```
elseif (type==8 && pKa[1] > 7)
```

```
    type_calc = 1
```

```
elseif (type==9 && pKa[3]>7)
```

```
    type_calc = 1
```

```

elseif (type==10 && pKa[2]>7)

  type_calc = 1

else

  type_calc = 2

end

# Multiply by fup to get Kp rather than Kpu

if (type_calc==1) #moderate to strong bases

  Kp_all = (dat_all[, :f_ew] + ((1 + X)/(1 + Y))*dat_all[, :f_iw] + ((P*dat_all[, :f_n_l] + (0.3*P + 0.7)*dat_all[, :f_n_pl]))/(1 + Y) +
  (Ka_AP*dat_all[, :f_a_pl]*X)/(1 + Y))*fup #non lipid

  Kp_ad = (dat_ad[, :f_ew] + ((1 + X)/(1 + Y))*dat_ad[, :f_iw] + ((P_OW*dat_ad[, :f_n_l] + (0.3*P_OW + 0.7)*dat_ad[, :f_n_pl]))/(1 +
  Y) + (Ka_AP*dat_ad[, :f_a_pl]*X)/(1 + Y))*fup #lipid

elseif (type_calc==2) #acidic and zwitterions

  Kp_all = (dat_all[, :f_ew] + ((1 + X)/(1 + Y))*dat_all[, :f_iw] + ((P*dat_all[, :f_n_l] + (0.3*P + 0.7)*dat_all[, :f_n_pl]))/(1 + Y) +
  (Ka_PR*dat_all[, :AR]))*fup #non lipid

  Kp_ad = (dat_ad[, :f_ew] + ((1 + X)/(1 + Y))*dat_ad[, :f_iw] + ((P_OW*dat_ad[, :f_n_l] + (0.3*P_OW + 0.7)*dat_ad[, :f_n_pl]))/(1 +
  Y) + (Ka_PR*dat_ad[, :AR]))*fup #lipid

else #neutrals

  Kp_all = (dat_all[, :f_ew] + ((1 + X)/(1 + Y))*dat_all[, :f_iw] + ((P*dat_all[, :f_n_l] + (0.3*P + 0.7)*dat_all[, :f_n_pl]))/(1 + Y) +
  (Ka_PR*dat_all[, :LR]))*fup #non lipid

  Kp_ad = (dat_ad[, :f_ew] + ((1 + X)/(1 + Y))*dat_ad[, :f_iw] + ((P_OW*dat_ad[, :f_n_l] + (0.3*P_OW + 0.7)*dat_ad[, :f_n_pl]))/(1 +
  Y) + (Ka_PR*dat_ad[, :LR]))*fup #lipid

end

Kp = [Kp_ad; Kp_all]

Kp_df = DataFrame(Kp_values = Kp)

Kp_tissue1 = transform(dat_all, :tissue => ByRow(x-> lowercase(x)) => :tissue)

```

```
Kp_tissue2 = "Kp" .* select(Kp_tissue1, :tissue)
Kp_adipose = DataFrame.(tissue = ["Kpadipose"])
```

```
Kp_tissue = outerjoin(Kp_adipose, Kp_tissue2, on = :tissue)
```

```
Kp_values = hcat(Kp_tissue, Kp_df)
```

```
return(Kp_values)
```

```
end
```

```
## Poulin and Theil
```

```
rat_PT = CSV.File("/home/jrun/data/code/UF_LabLesvi/Data_IN/Kp_Methods/rat_PT_Edited.csv",
    missingstring=["", "NA", "."])
```

```
rat_PT_df = DataFrame(rat_PT)
```

```
function calcKp_PT(logP, pKa, fup, type, dat)
```

```
    dat_all = dat[findall(in(["Bone", "Gut", "Heart", "Kidney", "Liver", "Lung", "Muscle", "Spleen", "Skin"]), dat.tissue), :] #df for all except Adipose and Plasma
```

```
    dat_ad = filter(row -> row.tissue == ("Adipose"), dat) #df for Adipose
```

```
    dat_plas = filter(row -> row.tissue == ("Plasma"), dat) #df for Plasma
```

```
    Vwp = dat_plas[1,:f_water]
```

```
    Vnlp = dat_plas[1,:f_n_l]
```

```
    Vphp = dat_plas[1,:f_pl]
```

```
Vwt = dat_all[:, :f_water]
```

```
Vwad = dat_ad[1,:f_water]
```

```
Vnlt = dat_all[:, :f_n_l]
```

```
Vnlad = dat_ad[1,:f_n_l]
```

```
Vpht = dat_all[:, :f_pl]
```

```
Vphad = dat_ad[1,:f_pl]
```

```
pH = dat_ad[1,:pH]
```

```
logD = 1.115*logP-1.35 #logD is the olive oil:buffer(water) partition coefficient of nonionized species
```

```
#Calculate logD_star value
```

```
if type==1      #Neutral
```

```
    logD_star = logD
```

```
elseif type==2  #Monoprotic Acid
```

```
    logD_star = logD-log10(1+10^(pH-pKa))
```

```
elseif type==3  #Monoprotic Base
```

```
    logD_star = logD-log10(1+10^(pKa-pH))
```

```
elseif type==4  #Diprotic Acid
```

```
    logD_star = logD-log10(1+10^(2*pH-pKa[1]-pKa[2]))
```

```
elseif type==5  #Diprotic Base
```

```
    logD_star = logD-log10(1+10^(pKa[1]+pKa[2]-2*pH))
```

```
elseif type==6  #Monoprotic acid and Monoprotic base (acid comes first)
```

```

logD_star = logD-log10(1+10^(pKa[2]-pKa[1]))
elseif type==7    #Triprotic Acid
logD_star = logD-log10(1+10^(3*pH-pKa[1]-pKa[2]-pKa[3]))
elseif type==8    #Triprotic Base
logD_star = logD-log10(1+10^(pKa[1]+pKa[2]+pKa[3]-3*pH))
elseif type==9    #Diprotic acid and Monoprotic base (first two are acid)
logD_star = logD-log10(1+10^(pH-pKa[1]-pKa[2]+pKa[3]))
elseif type==10   #Monoprotic acid and Diprotic base (first one is acid)
logD_star = logD-log10(1+10^(pKa[2]+pKa[3]-pKa[1]-pH))
else
logD_star = "Type of Compound Not specified Correctly"
end

D_star = 10^logD_star

Kpad  = ((D_star*(Vnld+0.3*Vphad)+(1*(Vwad+0.7*Vphad)))/(D_star*(Vnlp+0.3*Vphp)+(1*(Vwp+0.7*Vphp)))) * fup

P = 10^logP

fut = 1/(1+((1-fup)/fup)*0.5)

Kpt = ((P*(Vnlt+0.3*Vpht)+(1*(Vwt+0.7*Vpht)))/(P*(Vnlp+0.3*Vphp)+(1*(Vwp+0.7*Vphp)))) * (fup/fut)

Kp      = [Kpad; Kpt]
Kp_df   = DataFrame(Kp_values = Kp)
Kp_tissue1 = transform(dat_all, :tissue => ByRow(x-> lowercase(x)) => :tissue)

```

```
Kp_tissue2 = "Kp" .* select(Kp_tissue1, :tissue)
Kp_adipose = DataFrame.(tissue = ["Kpadipose"])
```

```
Kp_tissue = outerjoin(Kp_adipose, Kp_tissue2, on = :tissue)
```

```
Kp_values = hcat(Kp_tissue, Kp_df)
push!(Kp_values, ["Kppancreas", 0])
```

```
return(Kp_values)
end
```

```
##Berezhkovisky
```

```
rat_Berez = CSV.File("/home/jrun/data/code/UF_LabLesvi/Data_IN/Kp_Methods/rat_Berez_Edited.csv",
                    missingstring=["", "NA", "."])
rat_Berez_df = DataFrame(rat_Berez)
```

```
function calcKp_Berez(logP, pKa, fup, type, dat)
```

```
    dat_all = dat[findall(in(["Bone", "Gut", "Heart", "Kidney", "Liver", "Lung", "Muscle", "Spleen", "Skin"]), dat.tissue), :] #df for all except Adipose and Plasma
```

```
    dat_ad = filter(row -> row.tissue == ("Adipose"), dat) #df for Adipose
```

```
    dat_plas = filter(row -> row.tissue == ("Plasma"), dat) #df for Plasma
```

```
    Vwp = dat_plas[1,:f_water]
```

```
Vnlp = dat_plas[1,:f_n_l]
```

```
Vphp = dat_plas[1,:f_pl]
```

```
Vwt = dat_all[:, :f_water]
```

```
Vwad = dat_ad[1,:f_water]
```

```
Vnlt = dat_all[:, :f_n_l]
```

```
Vnlad = dat_ad[1,:f_n_l]
```

```
Vpht = dat_all[:, :f_pl]
```

```
Vphad = dat_ad[1,:f_pl]
```

```
pH = dat_ad[1,:pH]
```

```
logD = 1.115*logP-1.35 #logD is the olive oil:buffer(water) partition coefficient of nonionized species
```

```
#Calculate logD_star value
```

```
if type==1      #Neutral
```

```
    logD_star = logD
```

```
elseif type==2  #Monoprotic Acid
```

```
    logD_star = logD-log10(1+10^(pH-pKa))
```

```
elseif type==3  #Monoprotic Base
```

```
    logD_star = logD-log10(1+10^(pKa-pH))
```

```
elseif type==4  #Diprotic Acid
```

```
    logD_star = logD-log10(1+10^(2*pH-pKa[1]-pKa[2]))
```

```
elseif type==5  #Diprotic Base
```

```

logD_star = logD-log10(1+10^(pKa[1]+pKa[2]-2*pH))
elseif type==6    #Monoprotic acid and Monoprotic base (acid comes first)
    logD_star = logD-log10(1+10^(pKa[2]-pKa[1]))
elseif type==7    #Triprotic Acid
    logD_star = logD-log10(1+10^(3*pH-pKa[1]-pKa[2]-pKa[3]))
elseif type==8    #Triprotic Base
    logD_star = logD-log10(1+10^(pKa[1]+pKa[2]+pKa[3]-3*pH))
elseif type==9    #Diprotic acid and Monoprotic base (first two are acid)
    logD_star = logD-log10(1+10^(pH-pKa[1]-pKa[2]+pKa[3]))
elseif type==10   #Monoprotic acid and Diprotic base (first one is acid)
    logD_star = logD-log10(1+10^(pKa[2]+pKa[3]-pKa[1]-pH))
else
    logD_star = "Type of Compound Not specified Correctly"
end

D_star = 10^logD_star

Kpad  = ((D_star*(Vnld+0.3*Vphad)+((Vwad+0.7*Vphad)))/(D_star*(Vnlp+0.3*Vphp)+((Vwp/fup)+0.7*Vphp)))

P  = 10^logP

fut = 1/(1+((1-fup)/(2*fup)))

Kpt = ((P*(Vnlt+0.3*Vpht)+((Vwt/fut)+0.7*Vpht))/(P*(Vnlp+0.3*Vphp)+((Vwp/fup)+0.7*Vphp)))

Kp      = [Kpad; Kpt]

```

```

Kp_df = DataFrame(Kp_values = Kp)
Kp_tissue1 = transform(dat_all, :tissue => ByRow(x-> lowercase(x)) => :tissue)
Kp_tissue2 = "Kp" .* select(Kp_tissue1, :tissue)
Kp_adipose = DataFrame.(tissue = ["Kpadipose"])

```

```

Kp_tissue = outerjoin(Kp_adipose, Kp_tissue2, on = :tissue)

```

```

Kp_values = hcat(Kp_tissue, Kp_df)
push!(Kp_values, ["Kppancreas", 0])

```

```

return(Kp_values)

```

```

end

```

```

## Calculation of the Kp values using the function for each

```

```

R_R = calcKp_RR(LogP, pKa, Fubb_rat, BP_rat, Type_of_compound, 1, rat_RR_df)

```

```

P_T = calcKp_PT(LogP, pKa, Fubb_rat, Type_of_compound, rat_PT_df)

```

```

Berez = calcKp_Berez(LogP, pKa, Fubb_rat, Type_of_compound, rat_Berez_df)

```

```

df_Kp_values = outerjoin(R_R, P_T, Berez, on= :tissue, makeunique=true)

```

```

rename!(df_Kp_values, [:tissue, :R_R, :P_T, :Berez])

```

```

##Select the best KP Method and add the variable in the Final Kp Method

```

```
Best_Kp      = ____
```

```
convert_to_kpu = 1 #Divide by unbound fraction if you want to calculate unbound Kp (Kpu), else set to 1
```

```
Kp_scalar    = 1
```

```
Kpadipose_rat = (only(Best_Kp[in.(Best_Kp.tissue, Ref(["Kpadipose"])), :Kp_values]) / convert_to_kpu ) * Kp_scalar
```

```
Kpbone_rat   = (only(Best_Kp[in.(Best_Kp.tissue, Ref(["Kpbone"])), :Kp_values]) / convert_to_kpu ) * Kp_scalar
```

```
Kpgut_rat    = (only(Best_Kp[in.(Best_Kp.tissue, Ref(["Kpgut"])), :Kp_values]) / convert_to_kpu ) * Kp_scalar
```

```
Kpheart_rat  = (only(Best_Kp[in.(Best_Kp.tissue, Ref(["Kpheart"])), :Kp_values]) / convert_to_kpu ) * Kp_scalar
```

```
Kpkidney_rat = (only(Best_Kp[in.(Best_Kp.tissue, Ref(["Kpkidney"])), :Kp_values]) / convert_to_kpu ) * Kp_scalar
```

```
Kpliver_rat  = (only(Best_Kp[in.(Best_Kp.tissue, Ref(["Kpliver"])), :Kp_values]) / convert_to_kpu ) * Kp_scalar
```

```
Kplung_rat   = (only(Best_Kp[in.(Best_Kp.tissue, Ref(["Kplung"])), :Kp_values]) / convert_to_kpu ) * Kp_scalar
```

```
Kpmuscle_rat = (only(Best_Kp[in.(Best_Kp.tissue, Ref(["Kpmuscle"])), :Kp_values]) / convert_to_kpu ) * Kp_scalar
```

```
Kpskin_rat   = (only(Best_Kp[in.(Best_Kp.tissue, Ref(["Kpskin"])), :Kp_values]) / convert_to_kpu ) * Kp_scalar
```

```
Kpspleen_rat = (only(Best_Kp[in.(Best_Kp.tissue, Ref(["Kpspleen"])), :Kp_values]) / convert_to_kpu ) * Kp_scalar
```

```
Kprest_rat   = ((Kpadipose_rat + Kplung_rat + Kpbone_rat + Kpheart_rat + Kpkidney_rat + Kpmuscle_rat  
                  + Kpskin_rat + Kpspleen_rat + Kpgut_rat + Kpliver_rat )/10)
```

```
## Physiology of Rat
```

```
Weight_of_rat = 250 #gms (this will help to scale all volumes and blood flows accordingly)
```

```
## PBPK Model Rats ## -----
```

```
full_pbpk_model_rat_v1 = @model begin
```

```
  @param begin
```

```
    tvCL      ∈ RealDomain(lower = 0.1, upper=30.0)
```

```
    tvP_bbb   ∈ RealDomain(lower=1.67*10^-9, upper=1.67*10^-4)
```

```
     $\sigma_1$    ∈ RealDomain(lower = 0.001)
```

```
     $\sigma_2$    ∈ RealDomain(lower = 0.001)
```

```
  end
```

```
  @pre begin
```

```
    Weight = Weight_of_rat    #All parameters are scaled based on Weight of Rat
```

```
  ## Volumes (mL) ## -----
```

```
  ## Brain
```

```
    Vbtotal = 1.24*(Weight/250)    #Vtotal is scaled to weight of rat since it is used in calculation of brain compartments
```

```
    Vbb     = Vbtotal*0.0310        #Brain blood (mL)
```

```
    Vccsf   = Vbtotal*0.144         #Cranial CSF (mL) (LV + TFV)
```

```
    Vscsf   = Vccsf*0.18750        #Spinal CSF (mL) (CM + SAS)
```

```
    Vbm     = Vbtotal - Vccsf - Vscsf #Brain mass (mL)
```

```
    Vecf    = 0.29 *(Weight/250)    #Extracellular Fluid, Part of Brain Mass
```

### ## Other Organ Volumes

|          |                       |                          |
|----------|-----------------------|--------------------------|
| Vlung    | = 1.24*(Weight/250)   | #Lung (mL)               |
| Vadipose | = 16.66*(Weight/250)  | #Adipose (mL)            |
| Vbone    | = 15.68*(Weight/250)  | #Bone (mL)               |
| Vheart   | = 1.05*(Weight/250)   | #Heart (mL)              |
| Vkidney  | = 2.19*(Weight/250)   | #Kidney (mL)             |
| Vmuscle  | = 116.13*(Weight/250) | #Muscle (mL)             |
| Vskin    | = 39.41*(Weight/250)  | #Skin (mL)               |
| Vspleen  | = 0.57*(Weight/250)   | #Spleen (mL)             |
| Vgut     | = 6.19*(Weight/250)   | #Gut (mL)                |
| Vliver   | = 8.57*(Weight/250)   | #Liver (mL)              |
| Vbla     | = 6.8*(Weight/250)    | #Arterial (mL)           |
| Vblv     | = 13.6*(Weight/250)   | #Venous (mL)             |
| Vrest    | = 1.3*(Weight/250)    | #Rest of the organs (mL) |

### ## Tissue Blood/CSF flows (mL/min) ## -----

|         |                   |                          |
|---------|-------------------|--------------------------|
| Qcarout | = 80*(Weight/250) | #Cardiac output (mL/min) |
|---------|-------------------|--------------------------|

### ## Brain

|        |                     |                              |
|--------|---------------------|------------------------------|
| Qbrain | = 1.12*(Weight/250) | #Bloodflow to brain (mL/min) |
|--------|---------------------|------------------------------|

|                 |                       |                               |
|-----------------|-----------------------|-------------------------------|
| Qproductionrate | = 0.0026*(Weight/250) | #CSF production rate (mL/min) |
|-----------------|-----------------------|-------------------------------|

|       |                         |                                       |
|-------|-------------------------|---------------------------------------|
| Qbulk | = 0.085*Qproductionrate | #bulk flow from brain to CSF (mL/min) |
|-------|-------------------------|---------------------------------------|

$Q_{ssink} = 0.37 \cdot (0.75 \cdot Q_{productionrate} + Q_{bulk})$  #flow spinal CSF to blood (mL/min)  
 $Q_{sout} = 0.9 \cdot Q_{ssink}$  #flow from spinal CSF to cranial CSF (mL/min)  
 $Q_{sin} = (Q_{ssink} + Q_{sout})$  #flow from cranial CSF to spinal CSF (mL/min)  
 $Q_{csink} = (0.75 \cdot Q_{productionrate} + Q_{bulk} - Q_{sin} + Q_{sout})$  #flow from cranial CSF to blood (mL/min)

## ## Other organs

$Q_{adipose} = 4.72 \cdot (Weight/250)$  #Adipose Tissue (mL/min)  
 $Q_{bone} = 8.08 \cdot (Weight/250)$  #Bone (mL/min)  
 $Q_{heart} = 3.2 \cdot (Weight/250)$  #Heart (mL/min)  
 $Q_{kidney} = 11.6 \cdot (Weight/250)$  #Kidney (mL/min)  
 $Q_{muscle} = 18.96 \cdot (Weight/250)$  #Muscle (mL/min)  
 $Q_{skin} = 4.08 \cdot (Weight/250)$  #Skin (mL/min)  
 $Q_{spleen} = 0.88 \cdot (Weight/250)$  #Spleen (mL/min)  
 $Q_{gut} = 8.08 \cdot (Weight/250)$  #Gut (mL/min) [Stomach & Oesophagus, Small Intestine, Large Intestine]  
 $Q_{ha} = 1.28 \cdot (Weight/250)$  #Hepatic Artery (mL/min)  
 $Q_{liver} = 10.24 \cdot (Weight/250)$  #Liver (mL/min)  
 $Q_{rest} = 1 \cdot (Weight/250)$  #Pancreas (mL/min)  
 $Q_{lung} = 80 \cdot (Weight/250)$  #Lung (mL/min) [100% of cardiac Output]

## ## Drug Specific Parameters ## -----

MW = Molecular\_Weight

BP = BP\_rat

Fubm = Fubm\_rat # Fraction unbound in brain mass

Fupl = Fupl\_rat # Fraction unbound in plasma  
Fubb = Fubb\_rat # Fraction unbound in blood  
Fuccsf = Fuccsf\_rat # Fraction unbound in cranial CSF  
Fuscsf = Fuscsf\_rat # Fraction unbound in spinal CSF

Kpadipose = Kpadipose\_rat  
Kplung = Kplung\_rat  
Kpbone = Kpbone\_rat  
Kpheart = Kpheart\_rat  
Kpkidney = Kpkidney\_rat  
Kpmuscle = Kpmuscle\_rat  
Kpskin = Kpskin\_rat  
Kpspleen = Kpspleen\_rat  
Kpgut = Kpgut\_rat  
Kpliver = Kpliver\_rat  
Kprest = Kprest\_rat

# Permeability surface area product (mL/min)

Permeability\_bbb = tvP\_bbb #cm/sec

BBB\_surface\_area = 1.8\*150 #cm<sup>2</sup>

PSb = Permeability\_bbb\*BBB\_surface\_area\*60 # PS BBB , Permeability surface area product (mL/min) -> Convert from cm<sup>3</sup>/sec to mL/min

PSe = 80 # PS brainmass-cranial CSF

PSc = 0.1 \* PSb # PS BCSFB , BBB Surface area of CSF is 1/10th of Brain

## PK Parameters ## -----

CL = tvCL

end

@dynamics begin

#### Differential Equations are in terms of Concentrations ####

$$C_{bb}' = (Q_{brain} \cdot (C_{bla} - C_{bb}) + P_{sb} \cdot (F_{ubm} \cdot C_{bm} - F_{ubb} \cdot C_{bb}) + P_{sc} \cdot (F_{uccsf} \cdot C_{ccsf} - F_{ubb} \cdot C_{bb}) + Q_{ssink} \cdot C_{scsf} + Q_{csink} \cdot C_{ccsf}) / V_{bb}$$

$$C_{bm}' = (P_{sb} \cdot (F_{ubb} \cdot C_{bb} - F_{ubm} \cdot C_{bm}) + P_{se} \cdot (F_{uccsf} \cdot C_{ccsf} - F_{ubm} \cdot C_{bm}) - Q_{bulk} \cdot C_{bm}) / V_{bm}$$

$$C_{ccsf}' = ((P_{se} \cdot (F_{ubm} \cdot C_{bm} - F_{uccsf} \cdot C_{ccsf})) + P_{sc} \cdot (F_{ubb} \cdot C_{bb} - F_{uccsf} \cdot C_{ccsf}) + Q_{bulk} \cdot C_{bm} + Q_{sout} \cdot C_{scsf} - Q_{sin} \cdot C_{ccsf} - Q_{csink} \cdot C_{ccsf}) / V_{ccsf}$$

$$C_{scsf}' = (Q_{sin} \cdot C_{ccsf} - Q_{sout} \cdot C_{scsf} - Q_{ssink} \cdot C_{scsf}) / V_{scsf}$$

$$C_{blv}' = (Q_{adipose} \cdot (C_{adipose} / K_{padipose} \cdot BP) + Q_{bone} \cdot (C_{bone} / K_{pbone} \cdot BP) + Q_{heart} \cdot (C_{heart} / K_{pheart} \cdot BP) + Q_{kidney} \cdot (C_{kidney} / K_{pkidney} \cdot BP) + Q_{muscle} \cdot (C_{muscle} / K_{pmuscle} \cdot BP) + Q_{skin} \cdot (C_{skin} / K_{pskin} \cdot BP) + Q_{liver} \cdot (C_{liver} / K_{pliver} \cdot BP) + Q_{brain} \cdot (C_{bb}) + Q_{rest} \cdot (C_{rest} / K_{prest} \cdot BP) - Q_{lung} \cdot (C_{blv} - (CL \cdot C_{blv}))) / V_{blv}$$

$$C_{bla}' = (Q_{lung} \cdot (C_{lung} / K_{plung} \cdot BP) - Q_{rest} \cdot C_{bla} - Q_{brain} \cdot C_{bla} - Q_{adipose} \cdot C_{bla} - Q_{bone} \cdot C_{bla} - Q_{heart} \cdot C_{bla} - Q_{kidney} \cdot C_{bla} - Q_{muscle} \cdot C_{bla} - Q_{skin} \cdot C_{bla} - Q_{spleen} \cdot C_{bla} - Q_{gut} \cdot C_{bla} - Q_{ha} \cdot C_{bla}) / V_{bla}$$

$$C_{lung}' = (Q_{lung} \cdot (C_{blv} - (C_{lung} / K_{plung} \cdot BP))) / V_{lung}$$

$$C_{adipose}' = (Q_{adipose} \cdot (C_{bla} - (C_{adipose} / K_{padipose} \cdot BP))) / V_{adipose}$$

$$C_{bone}' = (Q_{bone} \cdot (C_{bla} - (C_{bone} / K_{pbone} \cdot BP))) / V_{bone}$$

$$C_{heart}' = (Q_{heart} \cdot (C_{bla} - (C_{heart} / K_{pheart} \cdot BP))) / V_{heart}$$

```

Ckidney' = (Qkidney*(Cbla-(Ckidney/Kpkidney*BP)))/Vkidney
Cmuscle' = (Qmuscle*(Cbla-(Cmuscle/Kpmuscle*BP)))/Vmuscle
Cskin'   = (Qskin*(Cbla-(Cskin/Kpskin*BP)))/Vskin
Cspleen' = (Qspleen*(Cbla-(Cspleen/Kpspleen*BP)))/Vspleen
Crest'   = (Qrest*(Cbla-(Crest/Kprest*BP)))/Vrest
Cgut'    = (Qgut*(Cbla-(Cgut/Kpgut*BP)))/Vgut
Cliver'  = (Qha*Cbla + Qgut*(Cgut/Kpgut*BP) + Qspleen*(Cspleen/Kpspleen*BP) - Qliver*(Cliver/Kpliver*BP))/Vliver

end

@derived begin
  "Plasma Concentrations (ug/mL)"
  Cpplasma      = @. Cblv
  plasma_ug_mL ~ @. Normal(Cpplasma, σ1)

  "Brain Concentrations (ug/mL)"
  Cbrainmass    = @. Cbm
  brain_ug_mL   ~ @. Normal(Cbrainmass, σ2)
end

end

## Initial Parameters for the drug

initial_param = ( tvCL   = __,

```

```
tvP_bbb = __,
```

```
 $\sigma_1$  = __,
```

```
 $\sigma_2$  = __)
```

```
## Import Dataset of Rat for Drug (Author)
```

```
Drug_rat_data_df = DataFrame(CSV.File("/home/jrun/data/code/UF_LabLesvi/Data_IN/Drug/Author_Drug.csv",  
                                missingstring=["", "NA", "."]))
```

```
## Read the dataset into Pumas
```

```
Drug_rat = read_pumas(Drug_rat_data_df,  
                      id       = :ID,  
                      time     = :TIME_MINS,  
                      amt      = :AMT,  
                      observations = [:plasma_ug_mL, :brain_ug_mL],  
                      evid     = :EVID,  
                      cmt      = :CMT,  
                      rate     = :RATE)
```

```
## Fit the data using a Naive Pooled Approach
```

```
pkfit_np = fit(full_pbpk_model_rat_v1,  
               Drug_rat,  
               initial_param,
```

```
Pumas.NaivePooled())
```

## Julia Code for PBPK Model in Humans

```
##PBPK model in Humans - Drug
```

```
## Load necessary libraries
```

```
using Random, Pumas, CairoMakie, PumasPlots, GlobalSensitivity, Random, Weave, CSV, Latexify, Chain, HTTP, AlgebraOfGraphics, DataFramesMeta, CategoricalArrays
```

```
## Number of individuals, the code is written for both males (N) and females (NF) to account for physiological differences between gender
```

```
N = ____
```

```
NF = ____
```

```
Total_Samples = N + NF
```

```
## Age (y)
```

```
Random.seed!(123)
```

```
agemultiplemale=rand(Uniform(____,____), N)    #age (range) multiple virtual male individuals (uniform distribution)
```

```
Random.seed!(1234)
```

```
agemultiplefemale=rand(Uniform(____,____), NF)    #age (range) multiple virtual female individuals (uniform distribution)
```

## Height (cm), Weight (kg) and BSA (m<sup>2</sup>) Calculations: (equations are derived from SimCYP adult simulator)

#### Males:

Height\_male\_adults\_gr18=175.32 .+ 0.1113 .\* agemultiplemale .- 0.0025 .\* agemultiplemale .^2

Random.seed!(123)

Height\_male\_adults\_gr18cv=rand(Normal(0,0.039),N) # CV

Height\_male\_adults\_gr18var= Height\_male\_adults\_gr18 .\* exp.(Height\_male\_adults\_gr18cv)

Weight\_male\_adults\_gr18=exp.(2.643 .+ 0.0099 .\* Height\_male\_adults\_gr18var)

Random.seed!(123)

Weight\_male\_adults\_gr18cv=rand(Normal(0,0.15),N) # CV

Weight\_male\_adults\_gr18var= Weight\_male\_adults\_gr18 .\* exp.(Weight\_male\_adults\_gr18cv)

BSA\_male\_adults\_gr18=0.007184 .\* Height\_male\_adults\_gr18var .^ 0.725 .\*Weight\_male\_adults\_gr18var .^ 0.425

#### Females:

Height\_female\_adults\_gr18=161.66 .+ 0.1319 .\* agemultiplefemale .- 0.0027 .\* agemultiplefemale .^2

Random.seed!(123)

Height\_female\_adults\_gr18cv=rand(Normal(0,0.039),NF) # CV

Height\_female\_adults\_gr18var= Height\_female\_adults\_gr18 .\* exp.(Height\_female\_adults\_gr18cv)

Weight\_female\_adults\_gr18=exp.(2.7383 .+ 0.0091 .\* Height\_female\_adults\_gr18var)

Random.seed!(123)

Weight\_female\_adults\_gr18cv=rand(Normal(0,0.188),NF)

Weight\_female\_adults\_gr18var= Weight\_female\_adults\_gr18 .\* exp.(Weight\_female\_adults\_gr18cv)

BSA\_female\_adults\_gr18=0.007184 .\* Height\_female\_adults\_gr18var.^0.725 .\* Weight\_female\_adults\_gr18var.^0.425

Weight\_male\_females = [Weight\_male\_adults\_gr18var;Weight\_female\_adults\_gr18var]

##### Parameters #####

## Volumes (L) ## -----

##### Male

Vbrainmale=(1.449 .- 3.62 ./ Weight\_male\_adults\_gr18var) ./ 1.04      #brain total

Vbbmale=0.05 .\* Vbrainmale      #brain blood

Vccsfmale= Vbrainmale .\* 0.105 .\* 0.8      #cranial CSF

Vscsfmale=Vbrainmale .\* 0.105 .\* 0.2      #spinal CSF

Vbrainendmale=Vbrainmale .\* 0.005      #endothelial cells

Vbmmale=Vbrainmale .- Vbrainendmale .- Vbbmale .- Vccsfmale .- Vscsfmale #brain mass

Vlungmale=((29.08 .\* (Height\_male\_adults\_gr18var ./ 100) .\* Weight\_male\_adults\_gr18var.^0.5 .+ 11.06 .+ 35.47 .\*  
(Height\_male\_adults\_gr18var ./ 100) .\* Weight\_male\_adults\_gr18var.^0.5 .+ 5.53) ./ 1000) ./ 1.05

Vadiposemale=(1.36 .\* Weight\_male\_adults\_gr18var) ./ (Height\_male\_adults\_gr18var ./ 100) .- 42

Vadiposemale[Vadiposemale .< 0] . = 0.01    #used to avoid negative values

Vbonemale= (Weight\_male\_adults\_gr18var .- Vadiposemale .\* 0.92) ./ 1.3 .\* 0.058

Vbonemale[Vbonemale .< 0] . = 0.01      #used to avoid negative values

Vheartmale=(155.18 .\* (BSA\_male\_adults\_gr18).^1.29) ./ 1000 ./ 1.05

Vkidneymale=((15.4 .+ (2.04 .\* Weight\_male\_adults\_gr18var) .+ 51.8 .\* (Height\_male\_adults\_gr18var ./ 100) .^2) ./ 1000) ./ 1.05

Vmusclefemale=((0.244 .\* Weight\_male\_adults\_gr18var)

.+ (7.8 .\* (Height\_male\_adults\_gr18var ./ 100))

.- (0.098 .\* agemultiplefemale) .+ 3.3) ./ 1.04

Vskinmale=(((BSA\_male\_adults\_gr18 ./ 1000) .\* 45.655)

.+ ((BSA\_male\_adults\_gr18 ./ 1000) .\* 1240))

Vspleenmale=(6.516 .\* (Weight\_male\_adults\_gr18var) .^ 0.797) ./ 1000

Vgutmale=(0.021 .\* (Weight\_male\_adults\_gr18var .- Vadiposemale .\* 0.92)) ./ 1.05

Vlivermale=((1072.8 .\* (BSA\_male\_adults\_gr18)) .- 345.7) ./ 1000

Vblamale=(((13.1 .\* Height\_male\_adults\_gr18var)

.+ (18.05 .\* Weight\_male\_adults\_gr18var) .- 480) ./ 0.5723) ./ 1000) ./ 2

Vblvmale=(((13.1 .\* Height\_male\_adults\_gr18var) .+ (18.05 .\* Weight\_male\_adults\_gr18var) .- 480) ./ 0.5723) ./ 1000) ./ 2

Vrestmale=(Weight\_male\_adults\_gr18var .- Vblvmale .- Vblamale .- Vlivermale

.- Vgutmale .- Vspleenmale .- Vskinmale .- Vmusclefemale .- Vkidneymale

.- Vheartmale .- Vbonemale .- Vadiposemale .- Vlungmale .- Vbrainmale) #rest tissue

Vrestmale[Vrestmale .< 0] = 0.01 #used to avoid negative values

#### Female

Vbrainfemale=(1.449 .- 3.62 ./ Weight\_female\_adults\_gr18var) ./ 1.04 #brain total

Vbbfemale=0.05 .\* Vbrainfemale #brain blood

Vccsfemale=Vbrainfemale .\* 0.092 .\* 0.8 #cranial CSF

Vscsfemale=Vbrainfemale .\* 0.092 .\* 0.2 #spinal CSF

Vbrainendofemale=Vbrainfemale .\* 0.005 #endothelial cells

Vbmfemale=Vbrainfemale .- Vbrainendofemale .- Vbbfemale .- Vccsfemale .- Vscsfemale #brain mass

```

Vlungfemale=((31.46 .* (Height_female_adults_gr18var ./ 100)
.* Weight_female_adults_gr18var .^ 0.5 .+ 1.43 .+ 35.3
.*(Height_female_adults_gr18var ./ 100)
.* Weight_female_adults_gr18var .^ 0.5 .+ 1.53) ./ 1000) ./ 1.05

Vadiposefemale=(1.61 .* Weight_female_adults_gr18var) ./ (Height_female_adults_gr18var ./ 100) .- 38.3
Vadiposefemale[Vadiposefemale .< 0] . = 0.01      #used to avoid negative values

Vbonefemale=(Weight_female_adults_gr18var .- Vadiposefemale .* 0.92) ./ 1.3 .* 0.051
Vbonefemale[Vbonefemale .< 0] . = 0.01      #used to avoid negative values

Vheartfemale=(124.13 .* (BSA_female_adults_gr18) .^ 1.242) ./ 1000 ./ 1.05
Vkidneyfemale=((15.4 .+ (2.04 .* Weight_female_adults_gr18var) .+ 51.8
.* (Height_female_adults_gr18var ./ 100) .^ 2) ./ 1000) ./ 1.05
Vmusclefemale=((0.244 .* Weight_female_adults_gr18var)
.+ (7.8 .* (Height_female_adults_gr18var ./ 100))
.- (0.098 .* agemultiplefemale) .- 3.3) ./ 1.04
Vskinfemale=((BSA_female_adults_gr18 ./ 1000) .* 45.655) .+ ((BSA_female_adults_gr18 ./ 1000) .* 1240)
Vsplenefemale=(6.516 .* (Weight_female_adults_gr18var) .^ 0.797) ./ 1000
Vgutfemale=(0.027 .* (Weight_female_adults_gr18var .- Vadiposefemale .* 0.92)) ./ 1.05
Vliverfemale=((1072.8 .* (BSA_female_adults_gr18)) .- 345.7) ./ 1000
Vblafemale((((35.5 .* Height_female_adults_gr18var) .+ (2.27
.* Weight_female_adults_gr18var) .- 3382) ./ 0.6178) ./ 1000) ./ 2
Vblvfemale((((35.5 .* Height_female_adults_gr18var)
.+ (2.27 .* Weight_female_adults_gr18var) .- 3382) ./ 0.6178) ./ 1000) ./ 2

```

```

Vrestfemale= Weight_female_adults_gr18var .- Vblvfemale .- Vblafemale .-
    Vliverfemale .- Vgutfemale .- Vspleenfemale .- Vskinfemale .-
    Vmusclefemale .- Vkidneyfemale .- Vheartfemale .- Vbonefemale .-
    Vadiposefemale .- Vlungfemale .- Vbrainfemale #rest tissue
Vrestfemale[Vrestfemale .< 0] .= 0.01      #used to avoid negative values

```

```

## Tissue Blood/CSF flows (L/h) ## -----

```

```

##### Male

```

```

##Blood flows in Brain Compartments

```

```

Qcaroutmale= BSA_male_adults_gr18 .* 60 .* (3 .- (0.01 .* (agemultiplemale .- 20))) #cardiac output

```

```

Qbrainmale=Qcaroutmale .* 0.12 #blood flow to brain blood

```

```

Qproductionratemale=0.021 #CSF production

```

```

Random.seed!(123)

```

```

QproductionrateCVmale=rand(Normal(0,0.1),N)

```

```

Q_productionratemale= Qproductionratemale .* exp.(QproductionrateCVmale)

```

```

Qbulkmale=0.25 .* Q_productionratemale #bulk flow from brain mass to Cranial CSF

```

```

Random.seed!(123)

```

```

QbulkCVmale=rand(Normal(0,0.08),N)

```

```

Q_bulkmale= Qbulkmale .* exp.(QbulkCVmale)

```

$Q_{\text{sinkmale}} = 0.38 \cdot (0.75 \cdot Q_{\text{productionratemale}} + Q_{\text{bulkmale}})$  #flow from Spinal CSF to brain blood

Random.seed!(123)

$Q_{\text{sinkCVmale}} = \text{rand}(\text{Normal}(0, 0.3), N)$

$Q_{\text{ssinkmale}} = Q_{\text{sinkmale}} \cdot \exp(Q_{\text{sinkCVmale}})$

$Q_{\text{soutmale}} = 0.9 \cdot Q_{\text{ssinkmale}}$  #flow from Spinal CSF to Cranial CSF

Random.seed!(123)

$Q_{\text{soutCVmale}} = \text{rand}(\text{Normal}(0, 1), N)$

$Q_{\text{soutmale}} = Q_{\text{soutmale}} \cdot \exp(Q_{\text{soutCVmale}})$

$Q_{\text{sinmale}} = Q_{\text{ssinkmale}} + Q_{\text{soutmale}}$  #flow from Cranial CSF to Spinal CSF

$Q_{\text{csinkmale}} = (0.75 \cdot Q_{\text{productionratemale}} + Q_{\text{bulkmale}} - Q_{\text{sinmale}} + Q_{\text{soutmale}})$  #flow from Cranial CSF to brain blood

##Blood flows in Other Compartments of the Body

$Q_{\text{adiposemale}} = Q_{\text{caroutmale}} \cdot 0.05$

$Q_{\text{bonemale}} = Q_{\text{caroutmale}} \cdot 0.05$

$Q_{\text{heartmale}} = Q_{\text{caroutmale}} \cdot 0.04$

$Q_{\text{kidneymale}} = Q_{\text{caroutmale}} \cdot 0.19$

$Q_{\text{musclefemale}} = Q_{\text{caroutmale}} \cdot 0.17$

$Q_{\text{skinmale}} = Q_{\text{caroutmale}} \cdot 0.05$

$Q_{\text{spleenmale}} = Q_{\text{caroutmale}} \cdot 0.02$

$Q_{\text{gutmale}} = Q_{\text{caroutmale}} \cdot 0.15$

$Q_{\text{hamale}} = Q_{\text{caroutmale}} \cdot 0.065$

$Q_{\text{livermale}} = Q_{\text{caroutmale}} \cdot 0.235$

```

Qlungmale=Qcaroutmale .* 1
Qrestmale=Qcaroutmale .* 0.095    #Blood Flow to 'rest' of the organs not included as compartments
Qrestmale[Qrestmale .< 0] .= 0.1    #included to set negative restflow to 0.1

#### Female

##Blood flows in Brain Compartments

Qcaroutfemale= BSA_female_adults_gr18 .* 60 .* (3 .- (0.01 .* (agemultiplefemale .- 20))) #cardiac output

Qbrainfemale=Qcaroutfemale .* 0.12 #blood flow to brain blood

Qproductionratefemale=0.021 #CSF production
Random.seed!(123)
QproductionrateCVfemale=rand(Normal(0,0.1),NF)
Q_productionratefemale= Qproductionratefemale .* exp.(QproductionrateCVfemale)

Qbulkfemale=0.25 .* Q_productionratefemale #bulk flow from brain mass to Cranial CSF
Random.seed!(123)
QbulkCVfemale=rand(Normal(0,0.08),NF)
Q_bulkfemale= Qbulkfemale .* exp.(QbulkCVfemale)

Qssinkfemale=0.38 .* (0.75 .* Q_productionratefemale .+ Q_bulkfemale) #flow from Spinal CSF to brain blood
Random.seed!(123)
QssinkCVfemale=rand(Normal(0,0.3),NF)
Q_ssinkfemale = Qssinkfemale .* exp.(QssinkCVfemale)

```

Qsoutfemale=0.9 .\* Q\_ssinkfemale #flow from Spinal CSF to Cranial CSF

Random.seed!(123)

QsoutCVfemale=rand(Normal(0,1),NF)

Q\_soutfemale = Qsoutfemale .\* exp.(QsoutCVfemale)

Qsinfemale = Q\_ssinkfemale .+ Q\_soutfemale #flow from Cranial CSF to Spinal CSF

Qcsinkfemale= (0.75 .\* Q\_productionratefemale .+ Q\_bulkfemale .- Qsinfemale .+ Q\_soutfemale) #flow from Cranial CSF to brain blood

##Blood flows in Other Compartments of the Body

Qadiposefemale=Qcaroutfemale .\* 0.085

Qbonefemale=Qcaroutfemale .\* 0.05

Qheartfemale=Qcaroutfemale .\* 0.05

Qkidneyfemale=Qcaroutfemale .\* 0.17

Qmusclefemale=Qcaroutfemale .\* 0.12

Qskinfemale=Qcaroutfemale .\* 0.05

Qspleenfemale=Qcaroutfemale .\* 0.03

Qgutfemale=Qcaroutfemale .\* 0.17

Qhafemale=Qcaroutfemale .\* 0.065

Qliverfemale=Qcaroutfemale .\* 0.265

Qlungfemale=Qcaroutfemale .\* 1

Qrestfemale=Qcaroutfemale .\* 0.09 #Blood Flow to 'rest' of the organs not included as compartments

Qrestfemale[Qrestfemale .< 0] .= 0.1 #included to set negative restflow to 0.1

## Combine Parameters of Males and Females together for Simulation

Qbrain\_1 = [Qbrainmale;Qbrainfemale]

Qbulk\_1 = [Qbulkmale;Qbulkfemale]

Qssink\_1 = [Q\_ssinkmale;Q\_ssinkfemale]

Qcsink\_1 = [Qcsinkmale;Qcsinkfemale]

Qsout\_1 = [Q\_soutmale;Q\_soutfemale]

Qsin\_1 = [Qsinmale;Qsinfemale]

Qadipose\_1 = [Qadiposemale;Qadiposefemale] #Adipose Tissue (L/hr)

Qbone\_1 = [Qbonemale;Qbonefemale] #Bone (L/hr)

Qheart\_1 = [Qheartmale;Qheartfemale] #Heart (L/hr)

Qkidney\_1 = [Qkidneymale;Qkidneyfemale] #Kidney (L/hr)

Qmuscle\_1 = [Qmusclemale;Qmusclefemale] #Muscle (L/hr)

Qskin\_1 = [Qskinmale;Qskinfemale] #Skin (L/hr)

Qspleen\_1 = [Qspleenmale;Qspleenfemale] #Spleen (L/hr)

Qgut\_1 = [Qgutmale;Qgutfemale] #Gut (L/hr) [Stomach & Oesophagus, Small Intestine, Large Intestine]

Qha\_1 = [Qhamale;Qhafemale] #Hepatic Artery (L/hr)

Qliver\_1 = [Qlivermale;Qliverfemale] #Liver (L/hr)

Qrest\_1 = [Qrestmale;Qrestfemale] #Pancreas (L/hr)

Qlung\_1 = [Qlungmale;Qlungfemale] #Lung (L/hr) [100% of cardiac Output]

## Volumes of organs (L)

Vbb\_1 = [Vbbmale;Vbbfemale] #Brain blood (L)

Vccsf\_1 = [Vccsfmale;Vccsffemale] #Cranial CSF (L)

Vscsf\_1 = [Vscsfmale;Vscsffemale] #Spinal CSF (L)

```
Vbm_1 = [Vbmmale;Vbmfemale]    #Brain mass (L)
```

```
Vecf_1 = 0.29  #Exctracellular Fluid, Part of Brain Mass (L)
```

```
Vlung_1 = [Vlungmale;Vlungfemale]    #Lung (L)
```

```
Vadipose_1 = [Vadiposemale;Vadiposefemale]  #Adipose (L)
```

```
Vbone_1 = [Vbonemale;Vbonefemale]    #Bone (L)
```

```
Vheart_1 = [Vheartmale;Vheartfemale]    #Heart (L)
```

```
Vkidney_1 = [Vkidneymale;Vkidneyfemale]  #Kidney (L)
```

```
Vmuscle_1 = [Vmusclemale;Vmusclefemale]  #Muscle (L)
```

```
Vskin_1 = [Vskinmale;Vskinfemale]    #Skin (L)
```

```
Vspleen_1 = [Vspleenmale;Vspleenfemale]  #Spleen (L)
```

```
Vgut_1 = [Vgutmale;Vgutfemale]    #Gut (L)
```

```
Vliver_1 = [Vlivermale;Vliverfemale]    #Liver (L)
```

```
Vbla_1 = [Vblamale;Vblafemale]    #Arterial (L)
```

```
Vblv_1 = [Vblvmale;Vblvfemale]    #Venous (L)
```

```
Vrest_1 = [Vrestmale;Vrestfemale]    #Rest of the organs (L)
```

```
#Adding the Volumes and Blood Flows as covariates for each subject
```

```
choose_covariates(x) = (;
```

```
    Qbrain_human  = Qbrain_1[x],
```

```
    Qbulk_human   = Qbulk_1[x],
```

```
    Qssink_human  = Qssink_1[x],
```

```
    Qcsink_human  = Qcsink_1[x],
```

```
    Qsout_human   = Qsout_1[x],
```

Qsin\_human = Qsin\_1[x],  
Qadipose\_human = Qadipose\_1[x],  
Qbone\_human = Qbone\_1[x],  
Qheart\_human = Qheart\_1[x],  
Qkidney\_human = Qkidney\_1[x],  
Qmuscle\_human = Qmuscle\_1[x],  
Qskin\_human = Qskin\_1[x],  
Qspleen\_human = Qspleen\_1[x],  
Qgut\_human = Qgut\_1[x],  
Qha\_human = Qha\_1[x],  
Qliver\_human = Qliver\_1[x],  
Qrest\_human = Qrest\_1[x],  
Qlung\_human = Qlung\_1[x],  
Vbb\_human = Vbb\_1[x],  
Vccsf\_human = Vccsf\_1[x],  
Vscsf\_human = Vscsf\_1[x],  
Vbm\_human = Vbm\_1[x],  
Vlung\_human = Vlung\_1[x],  
Vadipose\_human = Vadipose\_1[x],  
Vbone\_human = Vbone\_1[x],  
Vheart\_human = Vheart\_1[x],  
Vkidney\_human = Vkidney\_1[x],  
Vmuscle\_human = Vmuscle\_1[x],  
Vskin\_human = Vskin\_1[x],  
Vspleen\_human = Vspleen\_1[x],  
Vgut\_human = Vgut\_1[x],

```
Vliver_human = Vliver_1[x],
Vbla_human   = Vbla_1[x],
Vblv_human   = Vblv_1[x],
Vrest_human  = Vrest_1[x])
```

```
## Drug Specific Parameters ## -----
```

```
##Blood to Plasma Ratio
```

```
BP_human = ____ # Blood to Plasma Ratio
```

```
##Unbound Fraction of drug
```

```
Fubm_human = ____ # Fraction unbound in brain mass
```

```
Fupl_human = ____ # Fraction unbound in plasma
```

```
Fubb_human = Fupl_human/BP_human # Fraction unbound in blood
```

```
Fuccsf_human = ____ # Fraction unbound in cranial CSF
```

```
Fuscsf_human = ____ # Fraction unbound in spinal CSF
```

```
##Physico Chemical Properties
```

```
LogP = ____
```

```
pKa = ____
```

```
Type_of_compound = ____ # 1-Neutral, 2-Monoprotic Acid, 3-Monoprotic Base
```

```
##Calculation of KP Methods
```

```
## Rodgers and Rowland
```

```
human_RR = CSV.File("/home/jrun/data/code/UF_LabLesvi/Data_IN/Kp_Methods/human_RR.csv",
```

```

missingstring=["", "NA", ".")
human_RR_df = DataFrame(human_RR)

function calcKp_RR(logP, pKa, fup, BP, type, P_ow_calc, dat::DataFrame)

    dat_all = dat[findall(in(["Bone","Gut","Heart","Kidney","Liver","Lung","Muscle","Pancreas","Skin","Spleen"]), dat.tissue), :] #df except
    Adipose, RBC and Plasma

    dat_ad = filter(row -> row.tissue == ("Adipose"), dat)    #df for Adipose
    dat_rbc = filter(row -> row.tissue == ("RBCs"), dat)      #df for RBCs
    dat_plas = filter(row -> row.tissue == ("Plasma"), dat)    #df for Plasma

    pH_IW = 7          #pH of intracellular tissue water
    pH_P = 7.4          #pH of plasma
    pH_RBC = 7.22       #pH of blood cells
    P = 10^(logP)        #Octanol:water partition coefficient

    #logP_OW calculation, Oil:Water partition coefficient
    if P_ow_calc == 1
        logP_OW = 1.115*logP - 1.35    #Hansch Equation
    else
        logP_OW = -4.653+((7.972/(1+10^(0.1175-0.2849*logP)))) #Bartels et al
    end

    P_OW = 10^(logP_OW)

    #Ka = 10^(-pKa)

    HCT = 0.45          #Hematocrit

```

$$K_{pu\_bc} = (HCT - 1 + BP)/(HCT * fup)$$

#Calculate X value

if type==1      #Neutral

$$X = 0$$

elseif type==2    #Monoprotic Acid

$$X = 10^{(pH\_IW - pKa)}$$

elseif type==3    #Monoprotic Base

$$X = 10^{(pKa - pH\_IW)}$$

elseif type==4    #Diprotic Acid

$$X = 10^{(pH\_IW - pKa[1])} + 10^{(2 * pH\_IW - pKa[1] - pKa[2])}$$

elseif type==5    #Diprotic Base

$$X = 10^{(pKa[2] - pH\_IW)} + 10^{(pKa[1] + pKa[2] - 2 * pH\_IW)}$$

elseif type==6    #Monoprotic acid and Monoprotic base (acid comes first)

$$X = 10^{(pKa[2] - pH\_IW)} + 10^{(pH\_IW - pKa[1])}$$

elseif type==7    #Triprotic Acid

$$X = 10^{(pH\_IW - pKa[1])} + 10^{(2 * pH\_IW - pKa[1] - pKa[2])} + 10^{(3 * pH\_IW - pKa[1] - pKa[2] - pKa[3])}$$

elseif type==8    #Triprotic Base

$$X = 10^{(pKa[3] - pH\_IW)} + 10^{(pKa[3] + pKa[2] - 2 * pH\_IW)} + 10^{(pKa[1] + pKa[2] + pKa[3] - 3 * pH\_IW)}$$

elseif type==9    #Diprotic acid and Monoprotic base (first two are acid)

$$X = 10^{(pKa[3] - pH\_IW)} + 10^{(pH\_IW - pKa[1])} + 10^{(2 * pH\_IW - pKa[1] - pKa[2])}$$

elseif type==10    #Monoprotic acid and Diprotic base (first one is acid)

$$X = 10^{(pH\_IW - pKa[1])} + 10^{(pKa[3] - pH\_IW)} + 10^{(pKa[2] + pKa[3] - 2 * pH\_IW)}$$

else

X = "Type of Compound Not specified Correctly"

end

#Calculate Y value

if type==1      #Neutral

    Y = 0

elseif type==2    #Monoprotic Acid

    Y =  $10^{(\text{pH\_P}-\text{pKa})}$

elseif type==3    #Monoprotic Base

    Y =  $10^{(\text{pKa}-\text{pH\_P})}$

elseif type==4    #Diprotic Acid

    Y =  $10^{(\text{pH\_P}-\text{pKa}[1])} + 10^{(2*\text{pH\_P}-\text{pKa}[1]-\text{pKa}[2])}$

elseif type==5    #Diprotic Base

    Y =  $10^{(\text{pKa}[2]-\text{pH\_P})} + 10^{(\text{pKa}[1]+\text{pKa}[2]-2*\text{pH\_P})}$

elseif type==6    #Monoprotic acid and Monoprotic base (acid comes first)

    Y =  $10^{(\text{pKa}[2]-\text{pH\_P})} + 10^{(\text{pH\_P}-\text{pKa}[1])}$

elseif type==7    #Triprotic Acid

    Y =  $10^{(\text{pH\_P}-\text{pKa}[1])} + 10^{(2*\text{pH\_P}-\text{pKa}[1]-\text{pKa}[2])} + 10^{(3*\text{pH\_P}-\text{pKa}[1]-\text{pKa}[2]-\text{pKa}[3])}$

elseif type==8    #Triprotic Base

    Y =  $10^{(\text{pKa}[3]-\text{pH\_P})} + 10^{(\text{pKa}[3]+\text{pKa}[2]-2*\text{pH\_P})} + 10^{(\text{pKa}[1]+\text{pKa}[2]+\text{pKa}[3]-3*\text{pH\_P})}$

elseif type==9    #Diprotic acid and Monoprotic base (first two are acid)

    Y =  $10^{(\text{pKa}[3]-\text{pH\_P})} + 10^{(\text{pH\_P}-\text{pKa}[1])} + 10^{(2*\text{pH\_P}-\text{pKa}[1]-\text{pKa}[2])}$

elseif type==10    #Monoprotic acid and Diprotic base (first one is acid)

    Y =  $10^{(\text{pH\_P}-\text{pKa}[1])} + 10^{(\text{pKa}[3]-\text{pH\_P})} + 10^{(\text{pKa}[2]+\text{pKa}[3]-2*\text{pH\_P})}$

else

    Y = "Type of Compound Not specified Correctly"

end

```

#Calculate Z value
if type==1      #Neutral
    Z = 1
elseif type==2  #Monoprotic Acid
    Z = 1
elseif type==3  #Monoprotic Base
    Z = 10^(pKa-pH_RBC)
elseif type==4  #Diprotic Acid
    Z = 1
elseif type==5  #Diprotic Base
    Z = 10^(pKa[2]-pH_RBC)+10^(pKa[1]+pKa[2]-2*pH_RBC)
elseif type==6  #Monoprotic acid and Monoprotic base (acid comes first)
    Z = 10^(pKa[2]-pH_RBC)+10^(pH_RBC-pKa[1])
elseif type==7  #Triprotic Acid
    Z = 1
elseif type==8  #Triprotic Base
    Z = 10^(pKa[3]-pH_RBC)+10^(pKa[3]+pKa[2]-2*pH_RBC)+10^(pKa[1]+pKa[2]+pKa[3]-3*pH_RBC)
elseif type==9  #Diprotic acid and Monoprotic base (first two are acid)
    Z = 10^(pKa[3]-pH_RBC)+10^(pH_RBC-pKa[1])+10^(2*pH_RBC-pKa[1]-pKa[2])
elseif type==10 #Monoprotic acid and Diprotic base (first one is acid)
    Z = 10^(pH_RBC-pKa[1])+10^(pKa[3]-pH_RBC)+10^(pKa[2]+pKa[3]-2*pH_RBC)
else
    Z = "Type of Compound Not specified Correctly"
end

```

```
Ka_AP = (Kpu_bc - (1 + Z)/(1 + Y)*dat_rbc[1,:f_iw] - (P*dat_rbc[1,:f_n_l] + (0.3*P + 0.7)*dat_rbc[1,:f_n_pl])/(1 + Y)) * (1 + Y)/dat_rbc[1,:f_a_pl]/Z
```

```
Ka_PR = ((1/fup) - 1 - ((P*dat_plas[1,:f_n_l] + (0.3*P + 0.7)*dat_plas[1,:f_n_pl])/(1+Y)))
```

```
# Assign the neutral type_calc=3, moderate to strong bases type_calc=1 and everything else type_calc=2
```

```
if type==1
```

```
    type_calc = 3
```

```
elseif (type==3 && pKa>7)
```

```
    type_calc = 1
```

```
elseif (type==5 && pKa>7)
```

```
    type_calc = 1
```

```
elseif (type==6 && pKa[2] > 7)
```

```
    type_calc = 1
```

```
elseif (type==8 && pKa[1] > 7)
```

```
    type_calc = 1
```

```
elseif (type==9 && pKa[3]>7)
```

```
    type_calc = 1
```

```
elseif (type==10 && pKa[2]>7)
```

```
    type_calc = 1
```

```
else
```

```
    type_calc = 2
```

```
end
```

```
# Multiply by fup to get Kp rather than Kpu
```

```
if (type_calc==1) #moderate to strong bases
```

```

      Kp_all = (dat_all[, :f_ew] + ((1 + X)/(1 + Y))*dat_all[, :f_iw] + ((P*dat_all[, :f_n_l] + (0.3*P + 0.7)*dat_all[, :f_n_pl]))/(1 + Y) +
      (Ka_AP*dat_all[, :f_a_pl]*X)/(1 + Y))*fup      #non lipid

      Kp_ad = (dat_ad[, :f_ew] + ((1 + X)/(1 + Y))*dat_ad[, :f_iw] + ((P_OW*dat_ad[, :f_n_l] + (0.3*P_OW + 0.7)*dat_ad[, :f_n_pl]))/(1 +
      Y) + (Ka_AP*dat_ad[, :f_a_pl]*X)/(1 + Y))*fup      #lipid

    elseif (type_calc==2) #acidic and zwitterions

      Kp_all = (dat_all[, :f_ew] + ((1 + X)/(1 + Y))*dat_all[, :f_iw] + ((P*dat_all[, :f_n_l] + (0.3*P + 0.7)*dat_all[, :f_n_pl]))/(1 + Y) +
      (Ka_PR*dat_all[, :AR]))*fup      #non lipid

      Kp_ad = (dat_ad[, :f_ew] + ((1 + X)/(1 + Y))*dat_ad[, :f_iw] + ((P_OW*dat_ad[, :f_n_l] + (0.3*P_OW + 0.7)*dat_ad[, :f_n_pl]))/(1 +
      Y) + (Ka_PR*dat_ad[, :AR]))*fup      #lipid

    else #neutrals

      Kp_all = (dat_all[, :f_ew] + ((1 + X)/(1 + Y))*dat_all[, :f_iw] + ((P*dat_all[, :f_n_l] + (0.3*P + 0.7)*dat_all[, :f_n_pl]))/(1 + Y) +
      (Ka_PR*dat_all[, :LR]))*fup      #non lipid

      Kp_ad = (dat_ad[, :f_ew] + ((1 + X)/(1 + Y))*dat_ad[, :f_iw] + ((P_OW*dat_ad[, :f_n_l] + (0.3*P_OW + 0.7)*dat_ad[, :f_n_pl]))/(1 +
      Y) + (Ka_PR*dat_ad[, :LR]))*fup      #lipid

    end

  Kp = [Kp_ad; Kp_all]

  Kp_df = DataFrame(Kp_values = Kp)

  Kp_tissue1 = transform(dat_all, :tissue => ByRow(x-> lowercase(x)) => :tissue)

  Kp_tissue2 = "Kp" .* select(Kp_tissue1, :tissue)

  Kp_adipose = DataFrame.(tissue = ["Kpadipose"])

  Kp_tissue = outerjoin(Kp_adipose, Kp_tissue2, on = :tissue)

  Kp_values = hcat(Kp_tissue, Kp_df)

  return(Kp_values)

```

end

## Poulin and Theil

human\_PT = CSV.File("/home/jrun/data/code/UF\_LabLesvi/Data\_IN/Kp\_Methods/human\_PT\_Edited.csv",

missingstring=["", "NA", "."])

human\_PT\_df = DataFrame(human\_PT)

function calcKp\_PT(logP, pKa, fup, type, dat)

dat\_all = dat[findall(in(["Bone", "Gut", "Heart", "Kidney", "Liver", "Lung", "Muscle", "Spleen", "Skin"]), dat.tissue), :] #df for all except  
Adipose and Plasma

dat\_ad = filter(row -> row.tissue == ("Adipose"), dat) #df for Adipose

dat\_plas = filter(row -> row.tissue == ("Plasma"), dat) #df for Plasma

Vwp = dat\_plas[1,:f\_water]

Vnlp = dat\_plas[1,:f\_n\_l]

Vphp = dat\_plas[1,:f\_pl]

Vwt = dat\_all[!, :f\_water]

Vwad = dat\_ad[1,:f\_water]

Vnlt = dat\_all[!,:f\_n\_l]

Vnlad = dat\_ad[1,:f\_n\_l]

Vpht = dat\_all[!,:f\_pl]

Vphad = dat\_ad[1,:f\_pl]

```
pH = dat_ad[1,:pH]
```

```
logD = 1.115*logP-1.35 #logD is the olive oil:buffer(water) partition coefficient of nonionized species
```

```
#Calculate logD_star value
```

```
if type==1      #Neutral
```

```
    logD_star = logD
```

```
elseif type==2  #Monoprotic Acid
```

```
    logD_star = logD-log10(1+10^(pH-pKa))
```

```
elseif type==3  #Monoprotic Base
```

```
    logD_star = logD-log10(1+10^(pKa-pH))
```

```
elseif type==4  #Diprotic Acid
```

```
    logD_star = logD-log10(1+10^(2*pH-pKa[1]-pKa[2]))
```

```
elseif type==5  #Diprotic Base
```

```
    logD_star = logD-log10(1+10^(pKa[1]+pKa[2]-2*pH))
```

```
elseif type==6  #Monoprotic acid and Monoprotic base (acid comes first)
```

```
    logD_star = logD-log10(1+10^(pKa[2]-pKa[1]))
```

```
elseif type==7  #Triprotic Acid
```

```
    logD_star = logD-log10(1+10^(3*pH-pKa[1]-pKa[2]-pKa[3]))
```

```
elseif type==8  #Triprotic Base
```

```
    logD_star = logD-log10(1+10^(pKa[1]+pKa[2]+pKa[3]-3*pH))
```

```
elseif type==9  #Diprotic acid and Monoprotic base (first two are acid)
```

```
    logD_star = logD-log10(1+10^(pH-pKa[1]-pKa[2]+pKa[3]))
```

```
elseif type==10 #Monoprotic acid and Diprotic base (first one is acid)
```

```
    logD_star = logD-log10(1+10^(pKa[2]+pKa[3]-pKa[1]-pH))
```

```
else
```

```
logD_star = "Type of Compound Not specified Correctly"  
end
```

```
D_star = 10^logD_star  
Kpad = ((D_star*(Vnlad+0.3*Vphad)+(1*(Vwad+0.7*Vphad)))/(D_star*(Vnlp+0.3*Vphp)+(1*(Vwp+0.7*Vphp)))) * fup
```

```
P = 10^logP  
fut = 1/(1+((1-fup)/fup)*0.5)
```

```
Kpt = ((P*(Vnlt+0.3*Vpht)+(1*(Vwt+0.7*Vpht)))/(P*(Vnlp+0.3*Vphp)+(1*(Vwp+0.7*Vphp)))) * (fup/fut)
```

```
Kp      = [Kpad; Kpt]  
Kp_df    = DataFrame.(Kp_values = Kp)  
Kp_tissue1 = transform(dat_all, :tissue => ByRow(x-> lowercase(x)) => :tissue)  
Kp_tissue2 = "Kp" .* select(Kp_tissue1, :tissue)  
Kp_adipose = DataFrame.(tissue = ["Kpadipose"])
```

```
Kp_tissue = outerjoin(Kp_adipose, Kp_tissue2, on = :tissue)
```

```
Kp_values = hcat(Kp_tissue, Kp_df)  
push!(Kp_values, ["Kppancreas", 0])
```

```
return(Kp_values)  
end
```

```
##Berezhkovisky
```

```

human_Berez = CSV.File("/home/jrun/data/code/UF_LabLesvi/Data_IN/Kp_Methods/human_Berez_Edited.csv",
                        missingstring=["", "NA", "."])
human_Berez_df = DataFrame(human_Berez)

function calcKp_Berez(logP, pKa, fup, type, dat)

    dat_all = dat[findall(in(["Bone", "Gut", "Heart", "Kidney", "Liver", "Lung", "Muscle", "Spleen", "Skin"]), dat.tissue), :] #df for all except
    Adipose and Plasma

    dat_ad = filter(row -> row.tissue == ("Adipose"), dat) #df for Adipose
    dat_plas = filter(row -> row.tissue == ("Plasma"), dat) #df for Plasma

    Vwp = dat_plas[1,:f_water]
    Vnlp = dat_plas[1,:f_n_l]
    Vphp = dat_plas[1,:f_pl]

    Vwt = dat_all[!, :f_water]
    Vwad = dat_ad[1,:f_water]
    Vnlt = dat_all[!, :f_n_l]
    Vnlad = dat_ad[1,:f_n_l]
    Vpht = dat_all[!, :f_pl]
    Vphad = dat_ad[1,:f_pl]

    pH = dat_ad[1,:pH]

    logD = 1.115*logP-1.35 #logD is the olive oil:buffer(water) partition coefficient of nonionized species

```

```

#Calculate logD_star value
if type==1    #Neutral
    logD_star = logD
elseif type==2    #Monoprotic Acid
    logD_star = logD-log10(1+10^(pH-pKa))
elseif type==3    #Monoprotic Base
    logD_star = logD-log10(1+10^(pKa-pH))
elseif type==4    #Diprotic Acid
    logD_star = logD-log10(1+10^(2*pH-pKa[1]-pKa[2]))
elseif type==5    #Diprotic Base
    logD_star = logD-log10(1+10^(pKa[1]+pKa[2]-2*pH))
elseif type==6    #Monoprotic acid and Monoprotic base (acid comes first)
    logD_star = logD-log10(1+10^(pKa[2]-pKa[1]))
elseif type==7    #Triprotic Acid
    logD_star = logD-log10(1+10^(3*pH-pKa[1]-pKa[2]-pKa[3]))
elseif type==8    #Triprotic Base
    logD_star = logD-log10(1+10^(pKa[1]+pKa[2]+pKa[3]-3*pH))
elseif type==9    #Diprotic acid and Monoprotic base (first two are acid)
    logD_star = logD-log10(1+10^(pH-pKa[1]-pKa[2]+pKa[3]))
elseif type==10   #Monoprotic acid and Diprotic base (first one is acid)
    logD_star = logD-log10(1+10^(pKa[2]+pKa[3]-pKa[1]-pH))
else
    logD_star = "Type of Compound Not specified Correctly"
end

```

```
D_star = 10^logD_star
```

```
Kpad = ((D_star*(Vnld+0.3*Vphad)+((Vwad+0.7*Vphad)))/(D_star*(Vnlp+0.3*Vphp)+((Vwp/fup)+0.7*Vphp)))
```

```
P = 10^logP
```

```
fut = 1/(1+((1-fup)/(2*fup)))
```

```
Kpt = ((P*(Vnlt+0.3*Vpht)+((Vwt/fut)+0.7*Vpht))/(P*(Vnlp+0.3*Vphp)+((Vwp/fup)+0.7*Vphp)))
```

```
Kp = [Kpad; Kpt]
```

```
Kp_df = DataFrame(Kp_values = Kp)
```

```
Kp_tissue1 = transform(dat_all, :tissue => ByRow(x-> lowercase(x)) => :tissue)
```

```
Kp_tissue2 = "Kp" .* select(Kp_tissue1, :tissue)
```

```
Kp_adipose = DataFrame(tissue = ["Kpadipose"])
```

```
Kp_tissue = outerjoin(Kp_adipose, Kp_tissue2, on = :tissue)
```

```
Kp_values = hcat(Kp_tissue, Kp_df)
```

```
push!(Kp_values, ["Kppancreas", 0])
```

```
return(Kp_values)
```

```
end
```

```
R_R = calcKp_RR(LogP, pKa, Fupl_human, BP_human, Type_of_compound, 1, human_RR_df)
```

```
P_T = calcKp_PT(LogP, pKa, Fupl_human, Type_of_compound, human_PT_df)
```

```
Berez = calcKp_Berez(LogP, pKa, Fupl_human, Type_of_compound, human_Berez_df)
```

```
df_Kp_values = outerjoin(R_R, P_T, Berez, on= :tissue, makeunique=true)
rename!(df_Kp_values, [:tissue, :R_R, :P_T, :Berez])
```

```
##Select the best KP Method and add the variable in the Final Kp Method
```

```
Best_Kp = ____
```

```
convert_to_kpu = 1 #Divide by unbound fraction if you want to calculate unbound Kp (Kpu), else set to 1
```

```
Kp_scalar = 1
```

```
Kpadipose_human = (only(Best_Kp[in.(Best_Kp.tissue, Ref(["Kpadipose"]))], :Kp_values]) / convert_to_kpu ) * Kp_scalar
Kpbone_human = (only(Best_Kp[in.(Best_Kp.tissue, Ref(["Kpbone"]))], :Kp_values]) / convert_to_kpu ) * Kp_scalar
Kpgut_human = (only(Best_Kp[in.(Best_Kp.tissue, Ref(["Kpgut"]))], :Kp_values]) / convert_to_kpu ) * Kp_scalar
Kpheart_human = (only(Best_Kp[in.(Best_Kp.tissue, Ref(["Kpheart"]))], :Kp_values]) / convert_to_kpu ) * Kp_scalar
Kpkidney_human = (only(Best_Kp[in.(Best_Kp.tissue, Ref(["Kpkidney"]))], :Kp_values]) / convert_to_kpu ) * Kp_scalar
Kpliver_human = (only(Best_Kp[in.(Best_Kp.tissue, Ref(["Kpliver"]))], :Kp_values]) / convert_to_kpu ) * Kp_scalar
Kplung_human = (only(Best_Kp[in.(Best_Kp.tissue, Ref(["Kplung"]))], :Kp_values]) / convert_to_kpu ) * Kp_scalar
Kpmuscle_human = (only(Best_Kp[in.(Best_Kp.tissue, Ref(["Kpmuscle"]))], :Kp_values]) / convert_to_kpu ) * Kp_scalar
Kpskin_human = (only(Best_Kp[in.(Best_Kp.tissue, Ref(["Kpskin"]))], :Kp_values]) / convert_to_kpu ) * Kp_scalar
Kpspleen_human = (only(Best_Kp[in.(Best_Kp.tissue, Ref(["Kpspleen"]))], :Kp_values]) / convert_to_kpu ) * Kp_scalar
Kprest_human = ((Kpadipose_human +Kplung_human +Kpbone_human +Kpheart_human +Kpkidney_human +Kpmuscle_human
+Kpskin_human +Kpspleen_human +Kpgut_human +Kpliver_human )/10)
```

```
##Permeability Parameters of Brain Same for both Males and Females)
```

```
Permeability_bbb = ____ # Permeability (cm/sec) (Source: Optimization of rat data)
```

```
BBB_surface_area = 150000 # Surface area of the BBB (cm^2)
```

```
PSb_human = Permeability_bbb*BBB_surface_area*3.6 # PS BBB , Permeability surface area product (L/h) -> Convert from cm^3/sec to L/hr
```

```
PSe_human = 300 # PS brainmass-cranial CSF
```

```
PSc_human = 0.1 * PSb_human # PS BCSFB , BBB Surface area of CSF is 1/10th of Brain
```

```
## PBPK Model Humans ## -----
```

```
full_pbpk_model_human_v1 = @model begin
```

```
  @param begin
```

```
    tvCL      ∈ RealDomain(lower=0.1, upper=100.0)
```

```
    tvKa      ∈ RealDomain(lower=0.1, upper=20)
```

```
    tvfa      ∈ RealDomain(lower=0.1, upper=1)
```

```
    tvlag     ∈ RealDomain(lower=1, upper=60)
```

```
    Ω         ∈ PDiagDomain(4)
```

```
  end
```

```
  @random begin
```

```
    η         ~ MvNormal(Ω)
```

```
  end
```

```
  @covariates Qbrain_human Qbulk_human Qssink_human Qcsink_human Qsout_human Qsin_human Qadipose_human Qbone_human  
  Qheart_human Qkidney_human Qmuscle_human Qskin_human Qspleen_human Qgut_human Qha_human Qliver_human Qrest_human  
  Qlung_human Vbb_human Vccsf_human Vscsf_human Vbm_human Vlung_human Vadipose_human Vbone_human Vheart_human  
  Vkidney_human Vmuscle_human Vskin_human Vspleen_human Vgut_human Vliver_human Vbla_human Vblv_human Vrest_human
```

@pre begin

#-----#

## Blood Flows (L/hr)

Qbrain = Qbrain\_human

Qbulk = Qbulk\_human

Qssink = Qssink\_human

Qcsink = Qcsink\_human

Qsout = Qsout\_human

Qsin = Qsin\_human

Qadipose = Qadipose\_human #Adipose Tissue (L/hr)

Qbone = Qbone\_human #Bone (L/hr)

Qheart = Qheart\_human #Heart (L/hr)

Qkidney = Qkidney\_human #Kidney (L/hr)

Qmuscle = Qmuscle\_human #Muscle (L/hr)

Qskin = Qskin\_human #Skin (L/hr)

Qspleen = Qspleen\_human #Spleen (L/hr)

Qgut = Qgut\_human #Gut (L/hr) [Stomach & Oesophagus, Small Intestine, Large Intestine]

Qha = Qha\_human #Hepatic Artery (L/hr)

Qliver = Qliver\_human #Liver (L/hr)

Qrest = Qrest\_human #Pancreas (L/hr)

Qlung = Qlung\_human #Lung (L/hr) [100% of cardiac Output]

#-----#

### ## Volumes of organs (L)

Vbb = Vbb\_human #Brain blood (L)

Vccsf = Vccsf\_human #Cranial CSF (L)

Vscsf = Vscsf\_human #Spinal CSF (L)

Vbm = Vbm\_human #Brain mass (L)

Vecf = 0.29 #Extracellular Fluid, Part of Brain Mass (L)

Vlung = Vlung\_human #Lung (L)

Vadipose = Vadipose\_human #Adipose (L)

Vbone = Vbone\_human #Bone (L)

Vheart = Vheart\_human #Heart (L)

Vkidney = Vkidney\_human #Kidney (L)

Vmuscle = Vmuscle\_human #Muscle (L)

Vskin = Vskin\_human #Skin (L)

Vspleen = Vspleen\_human #Spleen (L)

Vgut = Vgut\_human #Gut (L)

Vliver = Vliver\_human #Liver (L)

Vbla = Vbla\_human #Arterial (L)

Vblv = Vblv\_human #Venous (L)

Vrest = Vrest\_human #Rest of the organs (L)

#-----#

## Drug Specific Parameters (carried over from the front, no alteration required here)

## Unbound Fraction of drug

BP = BP\_human

Fubm = Fubm\_human # Fraction unbound in brain mass

Fupl = Fupl\_human # Fraction unbound in plasma

Fubb = Fubb\_human # Fraction unbound in blood

Fuccsf = Fuccsf\_human # Fraction unbound in cranial CSF

Fuscsf = Fuscsf\_human # Fraction unbound in spinal CSF

PSb = PSb\_human # PS BBB (L/hr) (Converted from  $\text{cm}^3/\text{sec}$  to L/hr)

PSe = PSe\_human # PS brainmass-cranial CSF

PSc = PSc\_human # PS BCSFB, BBB Surface area of CSF is 1/10th of Brain

Kpadipose = Kpadipose\_human

Kplung = Kplung\_human

Kpbone = Kpbone\_human

Kpheart = Kpheart\_human

Kpkidney = Kpkidney\_human

Kpmuscle = Kpmuscle\_human

Kpskin = Kpskin\_human

Kpspleen = Kpspleen\_human

Kpgut = Kpgut\_human

Kpliver = Kpliver\_human

Kprest = Kprest\_human

#-----#

##PK Parameters

##PK Parameters

$CL = (tvCL * \exp(\eta[1])) / BP$

$Ka = tvKa * \exp(\eta[2])$

end

@dosecontrol begin

lags = (Dosegutlumen = tvlag \*  $\exp(\eta[3])$ ),)

bioav = (Dosegutlumen = tvfa \*  $\exp(\eta[4])$ ),)

end

@dynamics begin

##Dose Compartment

$Dosegutlumen' = Dosegutlumen * -Ka$

#### Differential Equations are in terms of Concentrations ####

$Cbb' = (Q_{brain} * (C_{bla} - C_{bb}) + PS_b * (Fubm * C_{bm} - Fubb * C_{bb}) + PSc * (Fuccsf * C_{ccsf} - Fubb * C_{bb}) + Q_{sink} * C_{ccsf} + Q_{sink} * C_{ccsf}) / V_{bb}$

$Cbm' = (PS_b * (Fubb * C_{bb} - Fubm * C_{bm}) + PSc * (Fuccsf * C_{ccsf} - Fubm * C_{bm}) - Q_{bulk} * C_{bm}) / V_{bm}$

$$C_{ccsf}' = ((P_{se} * (F_{ubm} * C_{bm} - F_{uccsf} * C_{ccsf})) + P_{sc} * (F_{ubb} * C_{bb} - F_{uccsf} * C_{ccsf}) + Q_{bulk} * C_{bm} + Q_{sout} * C_{scsf} - Q_{sin} * C_{ccsf} - Q_{csink} * C_{ccsf}) / V_{ccsf}$$

$$C_{scsf}' = (Q_{sin} * C_{ccsf} - Q_{sout} * C_{scsf} - Q_{ssink} * C_{scsf}) / V_{scsf}$$

$$C_{blv}' = (Q_{adipose} * (C_{adipose} / K_{padipose} * BP) + Q_{bone} * (C_{bone} / K_{pbone} * BP) + Q_{heart} * (C_{heart} / K_{pheart} * BP) + Q_{kidney} * (C_{kidney} / K_{pkidney} * BP) + Q_{muscle} * (C_{muscle} / K_{pmuscle} * BP) + Q_{skin} * (C_{skin} / K_{pskin} * BP) + Q_{liver} * (C_{liver} / K_{pliver} * BP) + Q_{brain} * (C_{bb}) + Q_{rest} * (C_{rest} / K_{prest} * BP) - Q_{lung} * (C_{blv}) - (CL * C_{blv})) / V_{blv}$$

$$C_{bla}' = (Q_{lung} * (C_{lung} / K_{plung} * BP) - Q_{rest} * C_{bla} - Q_{brain} * C_{bla} - Q_{adipose} * C_{bla} - Q_{bone} * C_{bla} - Q_{heart} * C_{bla} - Q_{kidney} * C_{bla} - Q_{muscle} * C_{bla} - Q_{skin} * C_{bla} - Q_{spleen} * C_{bla} - Q_{gut} * C_{bla} - Q_{ha} * C_{bla}) / V_{bla}$$

$$C_{lung}' = (Q_{lung} * (C_{blv} - (C_{lung} / K_{plung} * BP))) / V_{lung}$$

$$C_{adipose}' = (Q_{adipose} * (C_{bla} - (C_{adipose} / K_{padipose} * BP))) / V_{adipose}$$

$$C_{bone}' = (Q_{bone} * (C_{bla} - (C_{bone} / K_{pbone} * BP))) / V_{bone}$$

$$C_{heart}' = (Q_{heart} * (C_{bla} - (C_{heart} / K_{pheart} * BP))) / V_{heart}$$

$$C_{kidney}' = (Q_{kidney} * (C_{bla} - (C_{kidney} / K_{pkidney} * BP))) / V_{kidney}$$

$$C_{muscle}' = (Q_{muscle} * (C_{bla} - (C_{muscle} / K_{pmuscle} * BP))) / V_{muscle}$$

$$C_{skin}' = (Q_{skin} * (C_{bla} - (C_{skin} / K_{pskin} * BP))) / V_{skin}$$

$$C_{spleen}' = (Q_{spleen} * (C_{bla} - (C_{spleen} / K_{pspleen} * BP))) / V_{spleen}$$

$$C_{rest}' = (Q_{rest} * (C_{bla} - (C_{rest} / K_{prest} * BP))) / V_{rest}$$

$$C_{gut}' = (Q_{gut} * (C_{bla} - (C_{gut} / K_{pgut} * BP)) + Dose_{gutlumen} * Ka) / V_{gut}$$

$$C_{liver}' = (Q_{ha} * C_{bla} + Q_{gut} * (C_{gut} / K_{pgut} * BP) + Q_{spleen} * (C_{spleen} / K_{pspleen} * BP) - Q_{liver} * (C_{liver} / K_{pliver} * BP)) / V_{liver}$$

end

@derived begin

"Plasma Concentrations (mg/L)"

$$C_{plasma} = @. C_{blv} / BP$$

"ECF Concentrations (mg/L)" # (Assuimg equal distribution in Brain Mass, correcting for volume of extracellular fluid)

$$C_{ecf} = @. C_{bm} * (V_{ecf} / V_{bm})$$

```

    "Spinal CSF Concentrations (mg/L)"
    Cspinal_csf = @. Cscsf
  end
end

```

```
##### PK Parameters for the drug ###
```

```

param_v1 = (tvKa      = ___,
            tvCL       = ___,
            tvfa       = ___,
            tvlag      = ___,
            Ω          = Diagonal([___,___,___,___])
            )

```

```
## Dosage Regimen ##
```

```

dosage_regimen = DosageRegimen(amt=___, time=___, cmt=___, addl=___, ii=___)
pop            = map(i -> Subject(id=i, events=dosage_regimen, covariates=choose_covariates(i)), 1:Total_Samples)

```

```
## Simulation ##
```

```

Random.seed!(45668)
sim_v1  = simobs(full_pbpk_model_human_v1, pop, param_v1, obstimes=0:0.1:24)
df      = DataFrame(sim_v1)
dropmissing!(df, :Cpplasma)
df_select = select(df, :id, :time, :Cpplasma, :Cecf, :Cspinal_csf)

```

```
## calculate the Quantiles
df_quantile = combine(groupby(df_select, :time),
  [n => (x -> (quantile(x, [0.0,0.05,0.50,0.95,1.0]))) => [n*_q0", n*_q05",n*_q50", n*_q95", n*_q100"]
  for n in ["Cpplasma", "Cecf", "Cspinal_csf"]])
df_mean = combine(groupby(df_select, :time),
  [col => fun for col in [:Cpplasma, :Cecf, :Cspinal_csf]
  for fun in [mean]])
df_quantile_mean = innerjoin(df_quantile,df_mean, on=[:time])
```
